# Supplementary material for: Gene flow contributes to diversification of the major fungal pathogen Candida albicans
Source: PubMed Central journal article supplement (PMC5993739; doi:10.1038/s41467-018-04787-4), 2018-06-08
Supplement: 41467_2018_4787_MOESM1_ESM.pdf [file 41467_2018_4787_MOESM1_ESM.pdf]

**Gene flow contributes to diversification of the major fungal pathogen *Candida albicans*.**

Ropars et al.

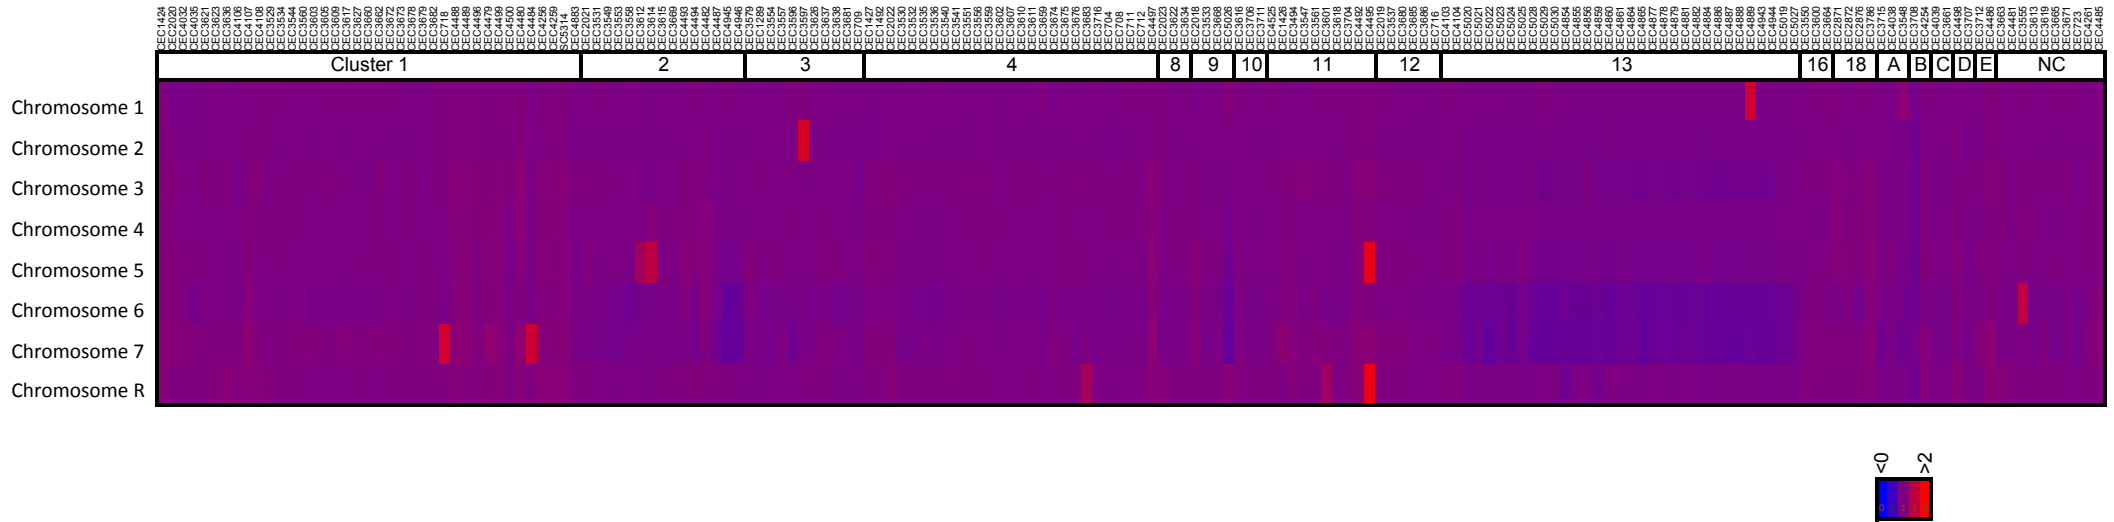

**Supplementary Fig. 1: Heatmap representing average sequencing depth on the eight chromosomes for the 182 isolates of *C. albicans*.**

Sequencing depth obtained for each bin of 1 kb on each chromosome was multiplied by the ploidy of the strain as defined from FACS analysis, divided by the genome sequencing depth and converted to log<sub>2</sub> values. These values were then corrected through division by the median of all values obtained for chromosomes that had an average sequencing depth that did not deviate by more than 20% from the average sequencing depth of the whole genome. Average of the values obtained for each chromosome is shown, with diploid chromosome at ~1, triploid chromosomes at ~1.58 and tetraploid chromosomes at ~2. The color scale is indicated. While examples of triploid or tetraploid chromosomes are observed, no example of haploid chromosome could be seen. We removed the three strains that are not diploid (see Supplementary Table 1).

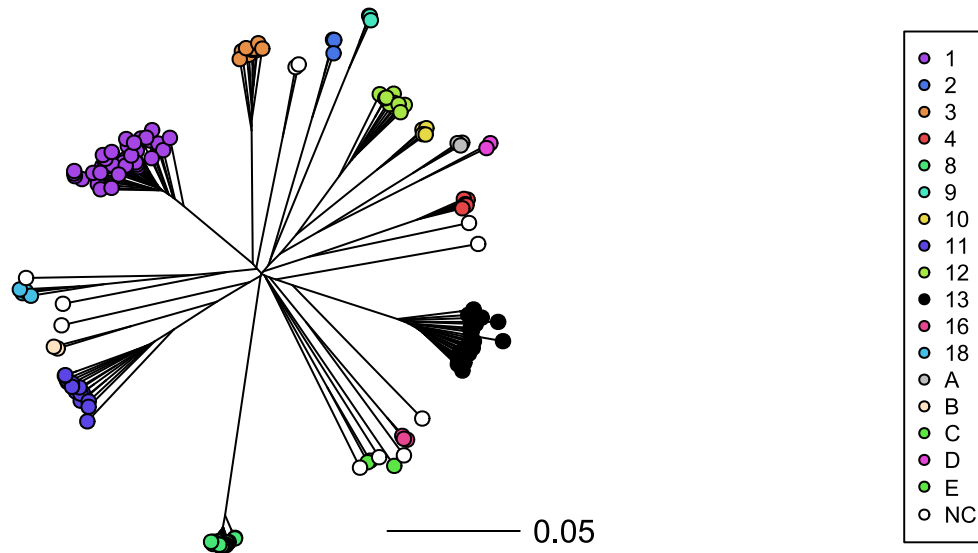

**Supplementary Fig. 2 (related to Fig. 2): Distance tree based on 183,974 insertion-deletion events (indels) information.**

Insertions at homozygous state were coded as 2, insertions at heterozygous state as 1 and no indel event as 0. Branch length are shown and the scale bar represents 0.05 number of differences per site.



**Supplementary Fig. 3 (related to Fig. 2): Hierarchical clustering of the 182 isolates of *C. albicans* based on the coverage of repeat regions (including long-terminal repeats, retrotransposons and repeat regions) normalized by chromosome.**

The clustering was generated by Cluster 3.0 using hierarchical clustering (complete linkage clustering) and the spearman rank correlation for measuring non-parametric distance, and visualized with java treeview by converting values in log2 scale. The scale bar on the top left indicates color codes.



**Supplementary Fig. 4: Graphic representation of counts of major / minor homozygous SNPs and heterozygous SNPs at a) the whole population level (182 isolates, 262,661 SNPs) and b) and c) at the cluster level.**

b) SNP positions invariant across cluster 1 were removed, the analysis thus included 28,142 polymorphic sites; c) SNP positions invariant across cluster 13 were removed, the analysis thus included 12,096 polymorphic sites. This shows an excess of homozygous SNPs at the whole population level and an excess of heterozygous SNPs within each cluster (shown here: clusters 1 and 13).

Fst along chromosome 2

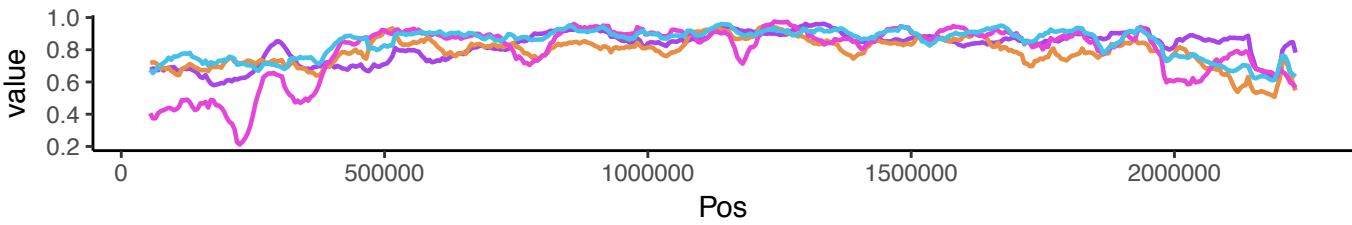

Fst

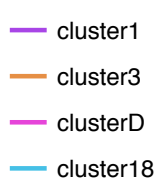

df along chromosome 2

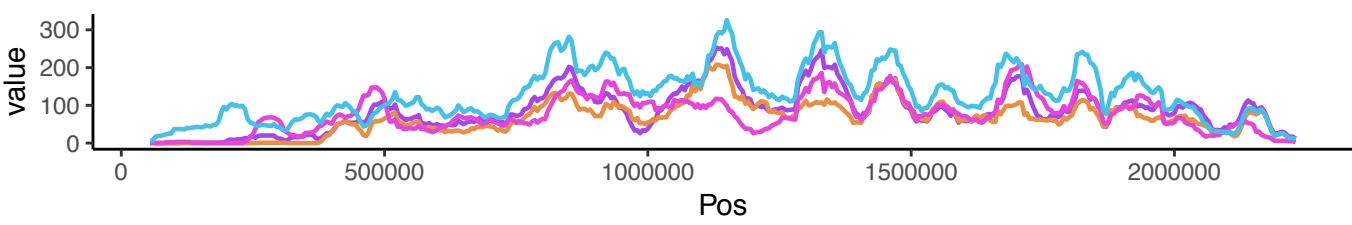

df

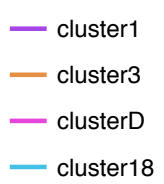

Fst along chromosome 3

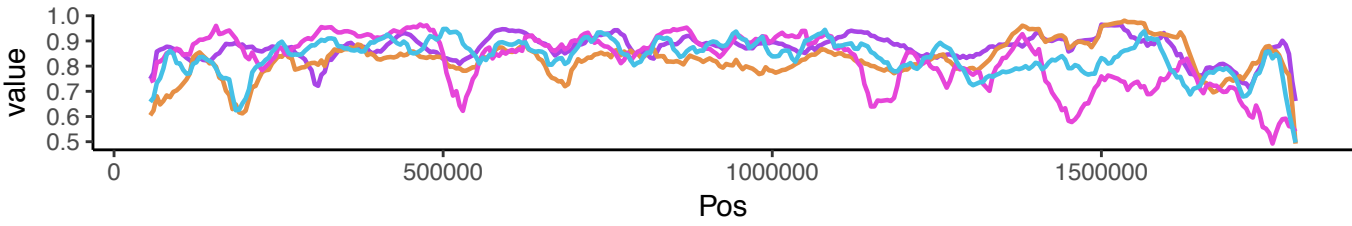

Fst

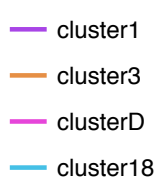

df along chromosome 3

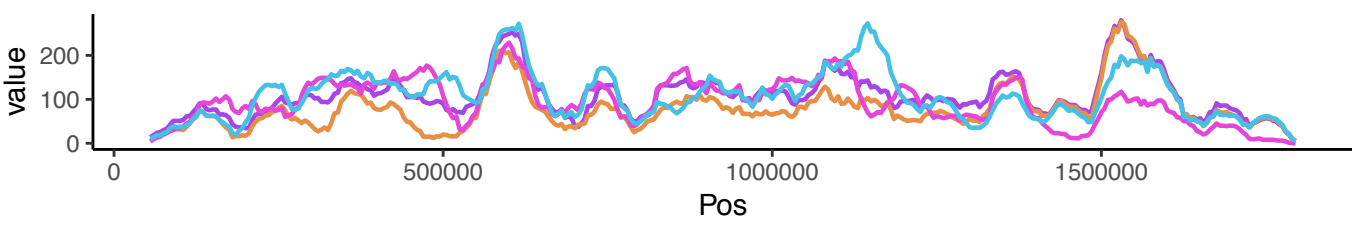

df

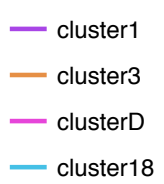

Fst along chromosome 4

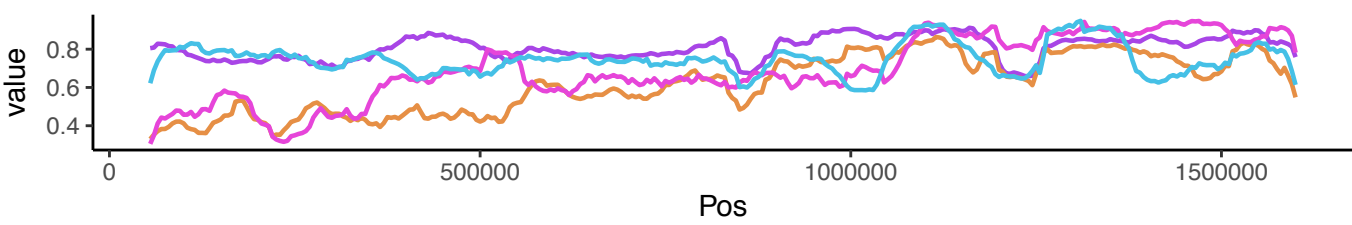

Fst

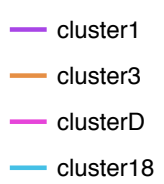

df along chromosome 4

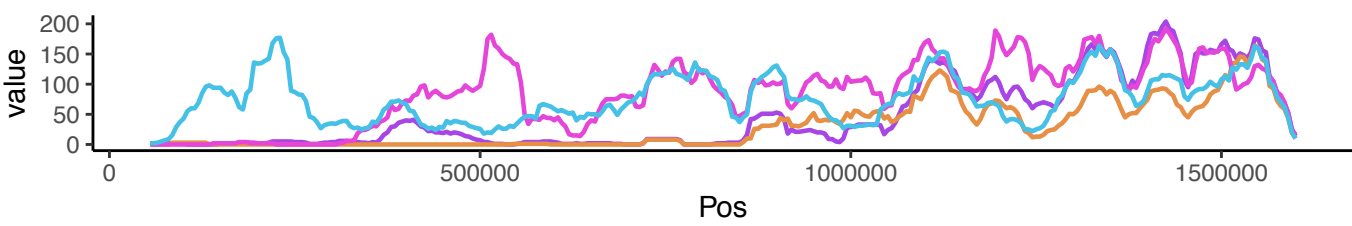

df

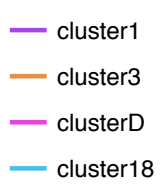

Fst along chromosome 5

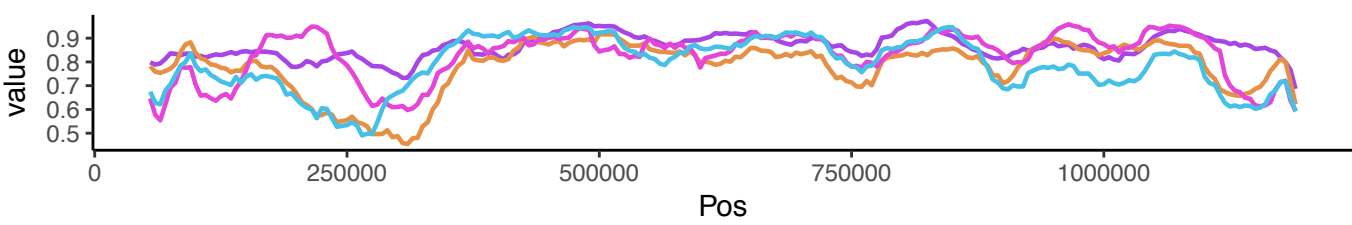

Fst

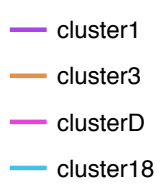

df along chromosome 5

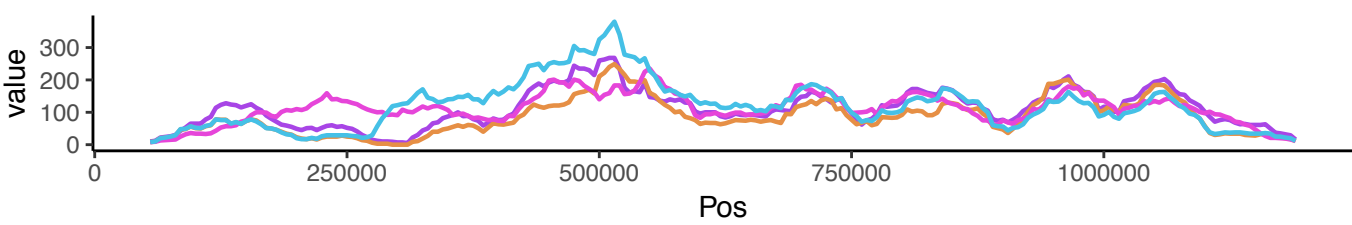

df

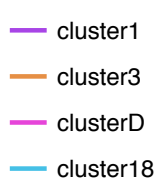



### Fst along chromosome 6

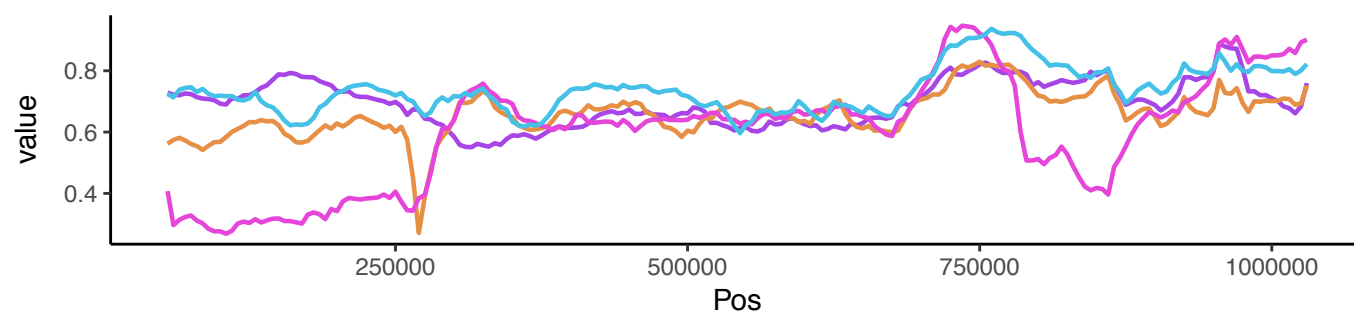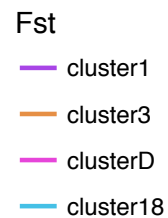

### df along chromosome 6

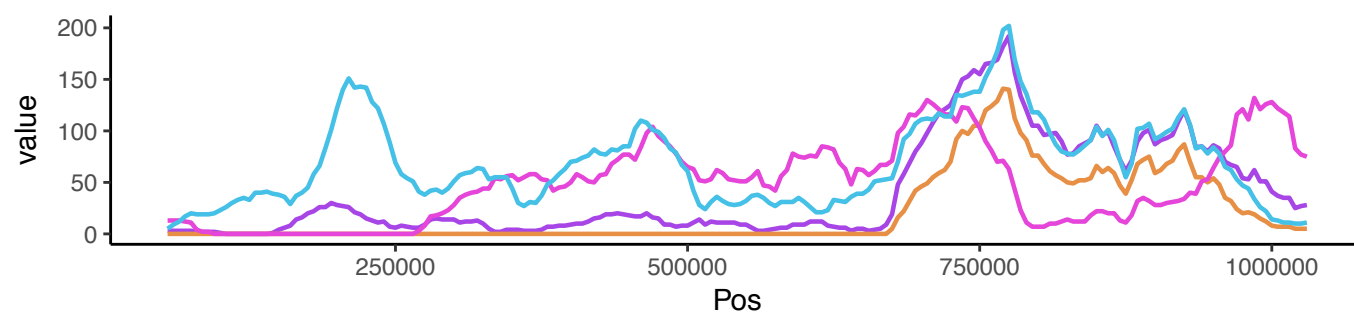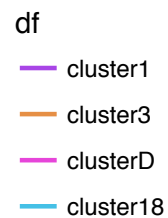

### Fst along chromosome 7

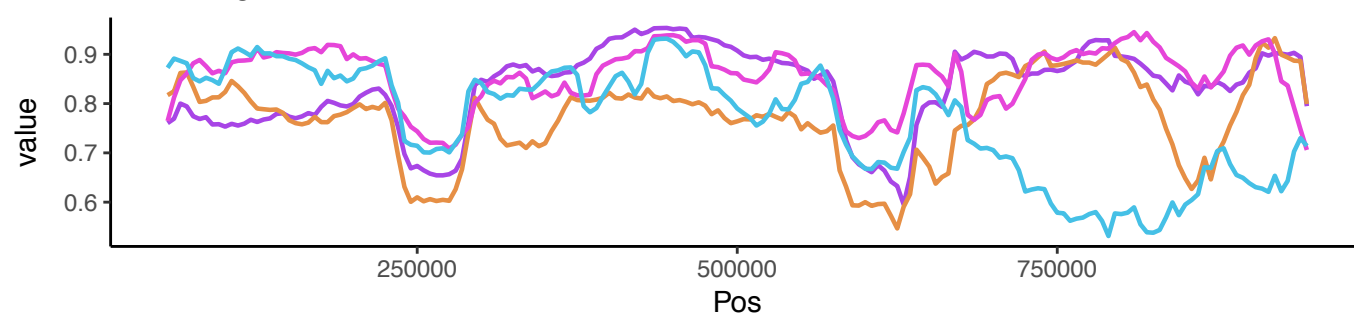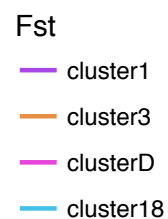

### df along chromosome 7

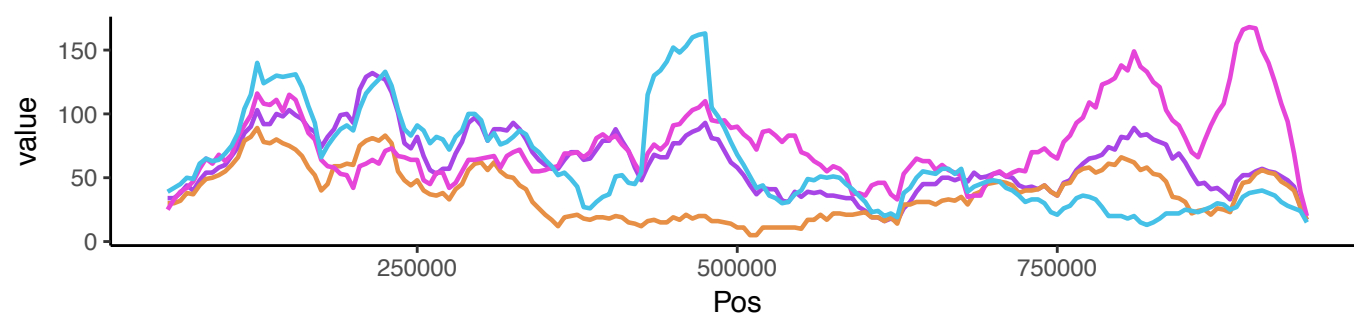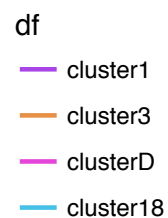

### Fst along chromosome R

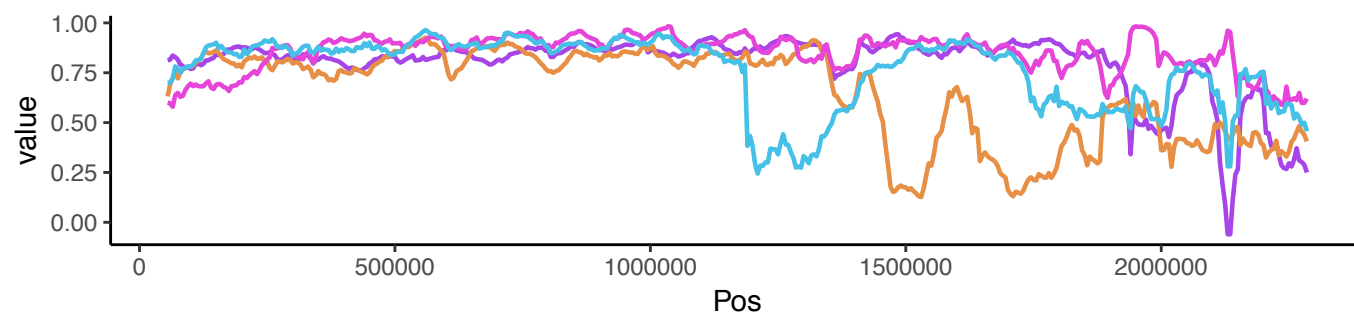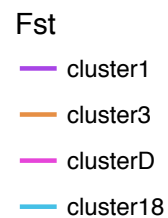

### df along chromosome R

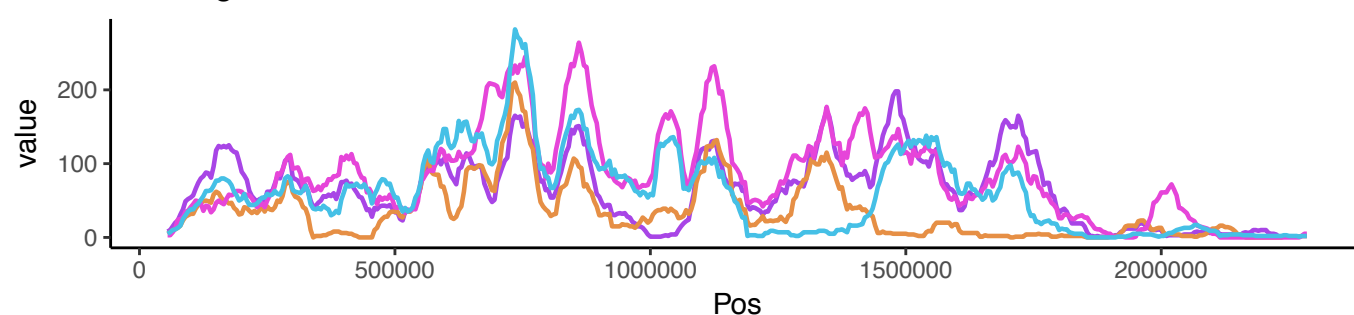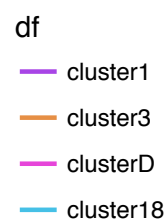

Supplementary Fig. 5 (related to Fig. 4): Genomic scans of  $F_{ST}$  (fixation index, an index measuring the differentiation between populations) and  $df$  (the number of fixed differences between populations) in sliding windows of 50 kb using a window step of 5,000 bp of cluster A compared to clusters 1, 3, D and 18 along chromosomes 2 to 7 and R.

Fst along chromosome 2

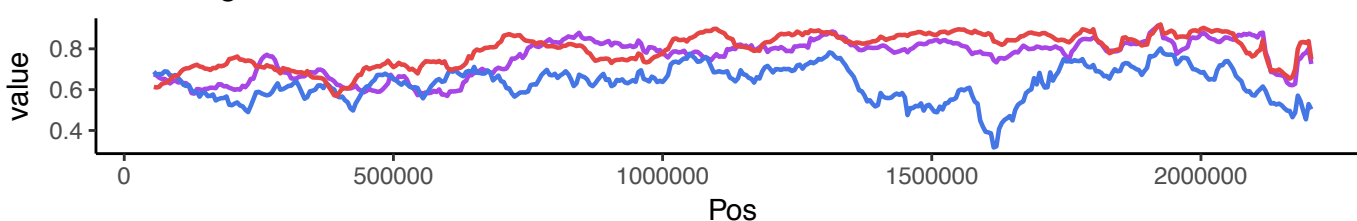

Fst

- cluster1
- cluster2
- cluster4

df along chromosome 2

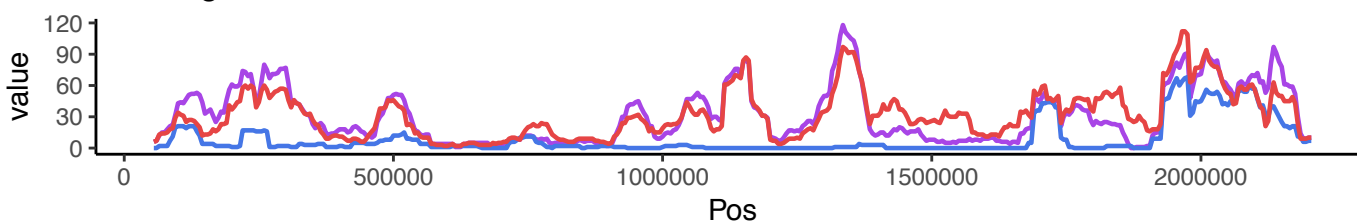

df

- cluster1
- cluster2
- cluster4

Fst along chromosome 3

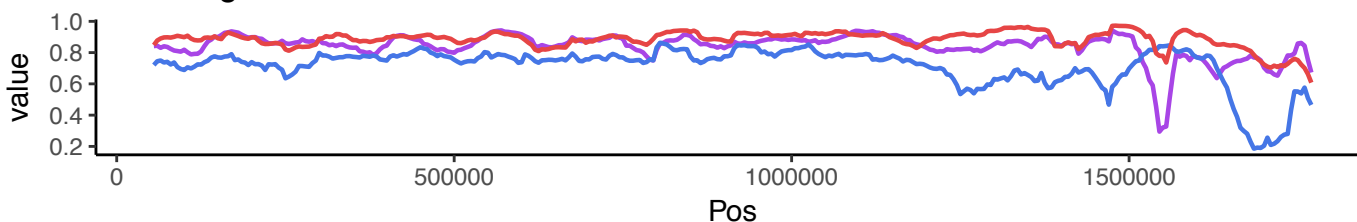

Fst

- cluster1
- cluster2
- cluster4

df along chromosome 3

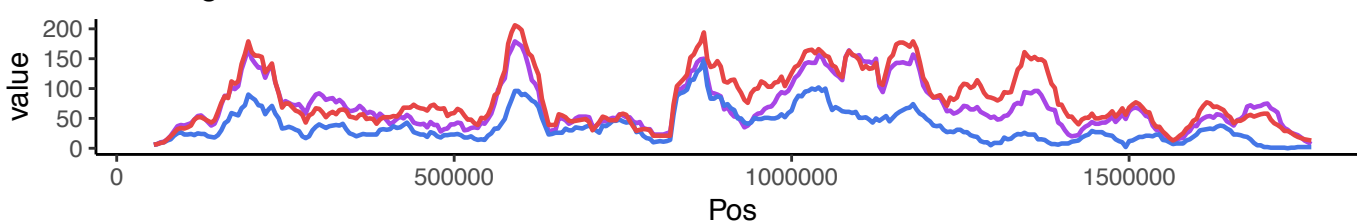

df

- cluster1
- cluster2
- cluster4

Fst along chromosome 4

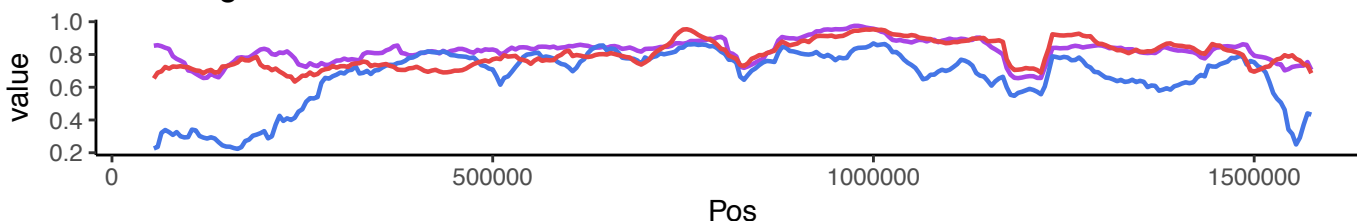

Fst

- cluster1
- cluster2
- cluster4

df along chromosome 4

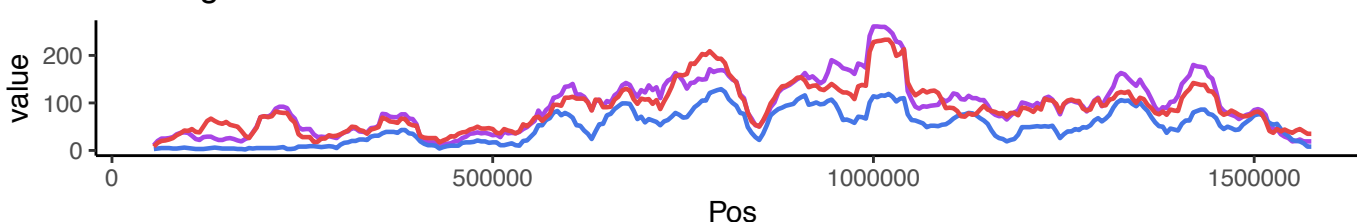

df

- cluster1
- cluster2
- cluster4

Fst along chromosome 5

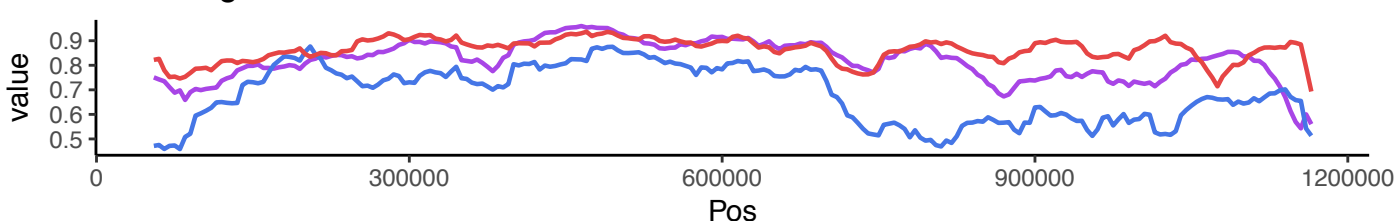

Fst

- cluster1
- cluster2
- cluster4

df along chromosome 5

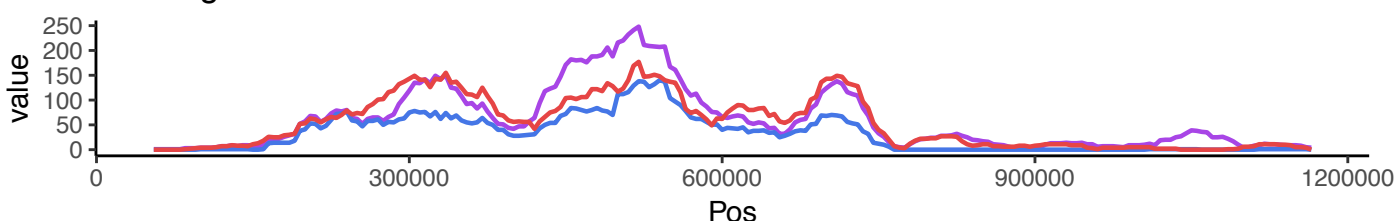

df

- cluster1
- cluster2
- cluster4

Fst along chromosome 6

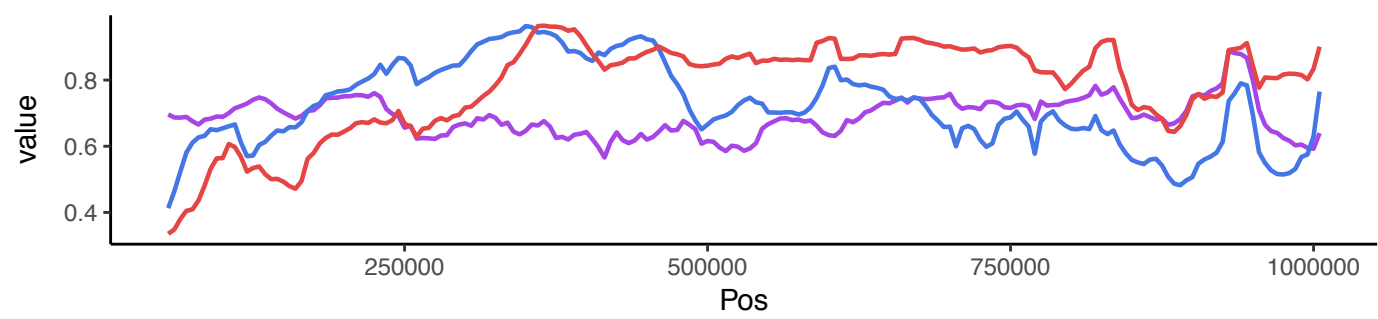

Fst

cluster1  
cluster2  
cluster4

df along chromosome 6

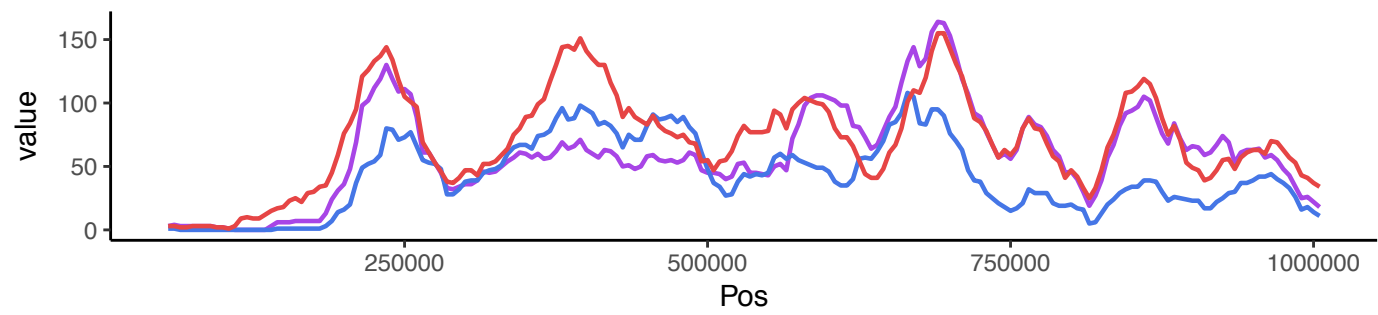

df

cluster1  
cluster2  
cluster4

Fst along chromosome 7

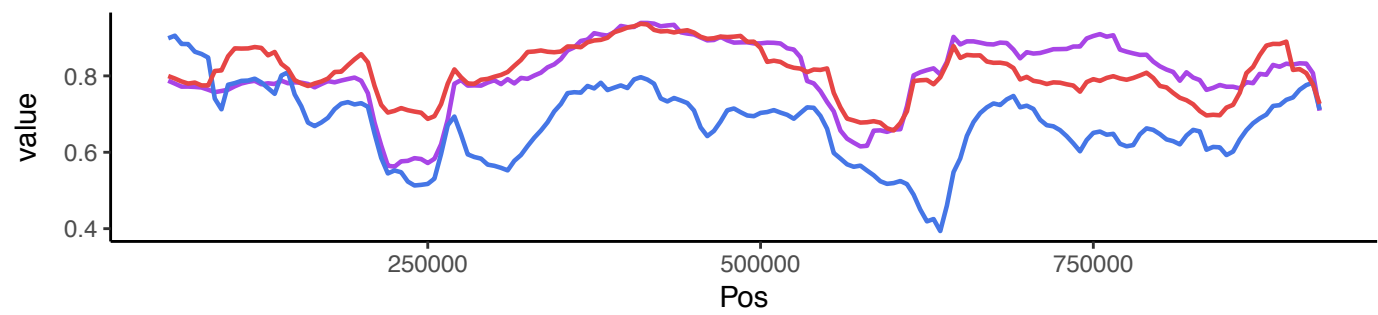

Fst

cluster1  
cluster2  
cluster4

df along chromosome 7

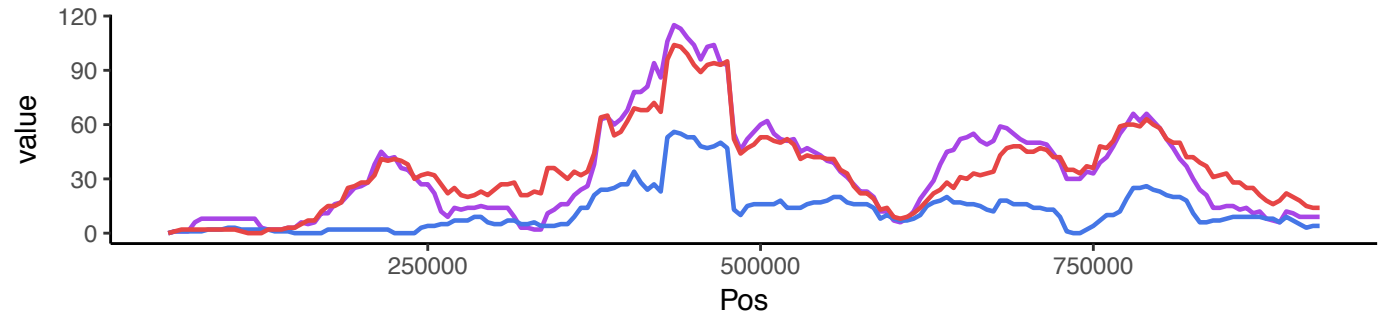

df

cluster1  
cluster2  
cluster4

Fst along chromosome R

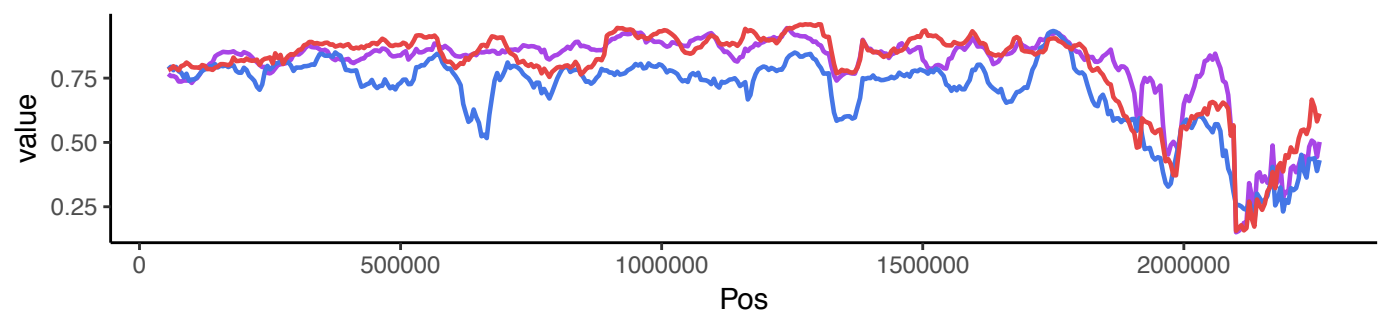

Fst

cluster1  
cluster2  
cluster4

df along chromosome R

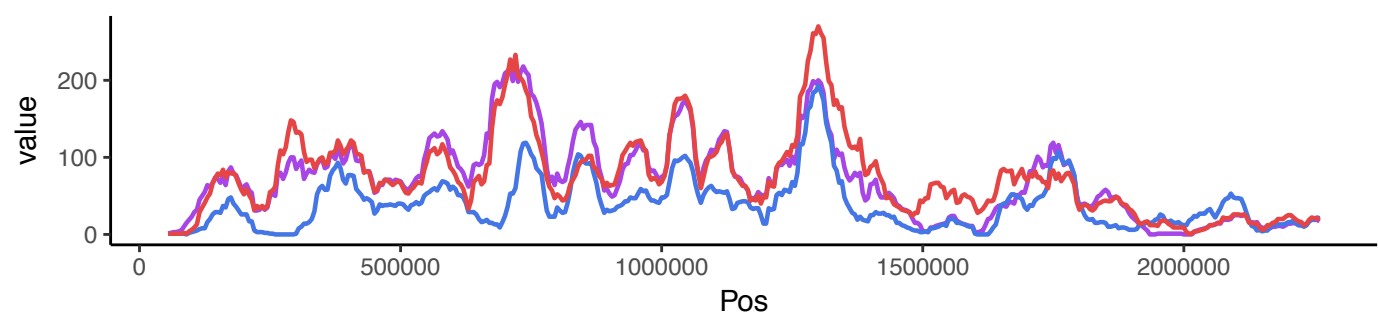

df

cluster1  
cluster2  
cluster4

Supplementary Fig. 6 (related to Fig. 4): Genomic scans of  $F_{ST}$  (fixation index, an index measuring the differentiation between populations) and  $d_f$  (the number of fixed differences between populations) in sliding windows of 50 kb using a window step of 5,000 bp of cluster B compared to clusters 2 and B along chromosomes 2 to 7 and R.

# CHROMOSOME 1: sliding windows of 50,000bp, step 5000

cluster1

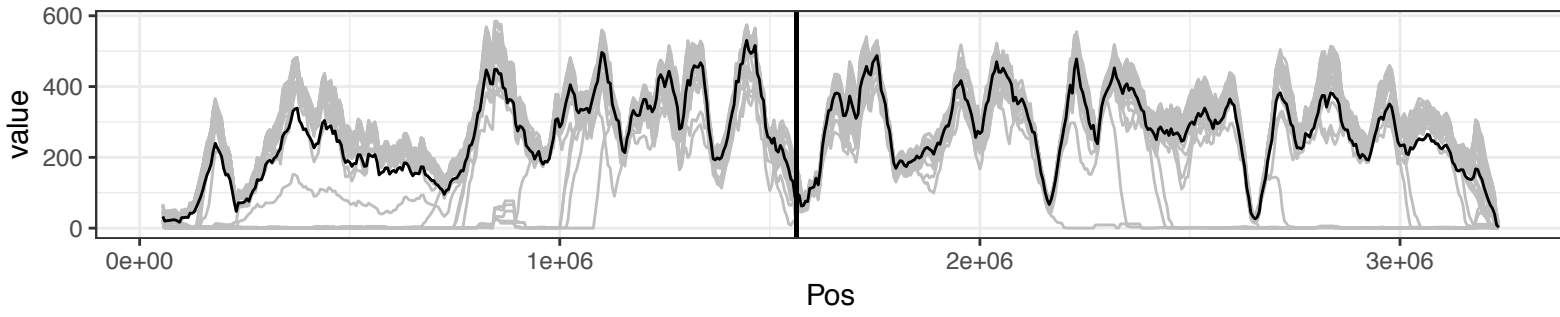

cluster2

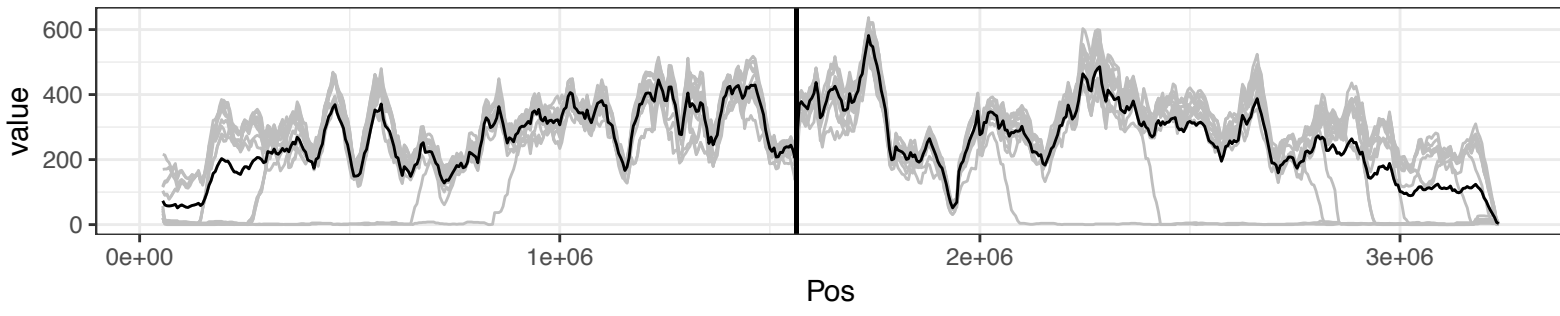

cluster3

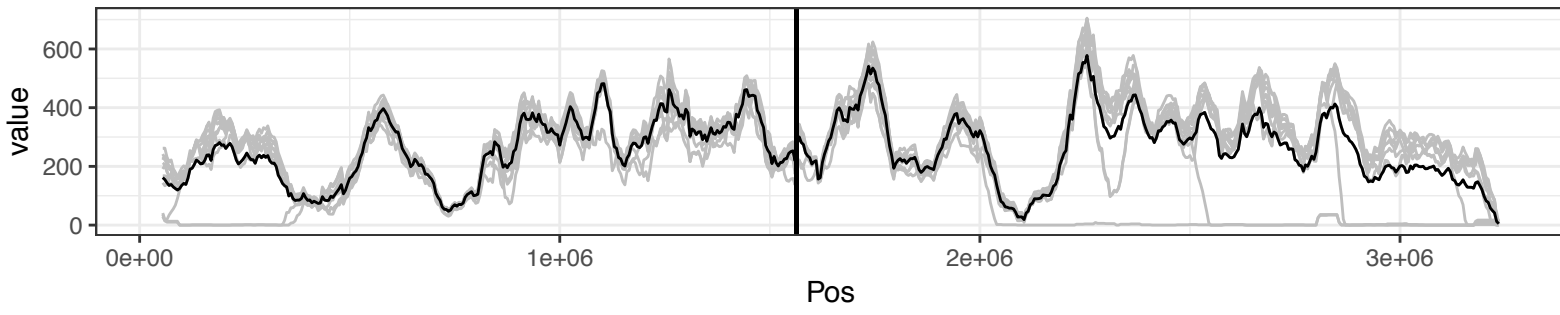

cluster4

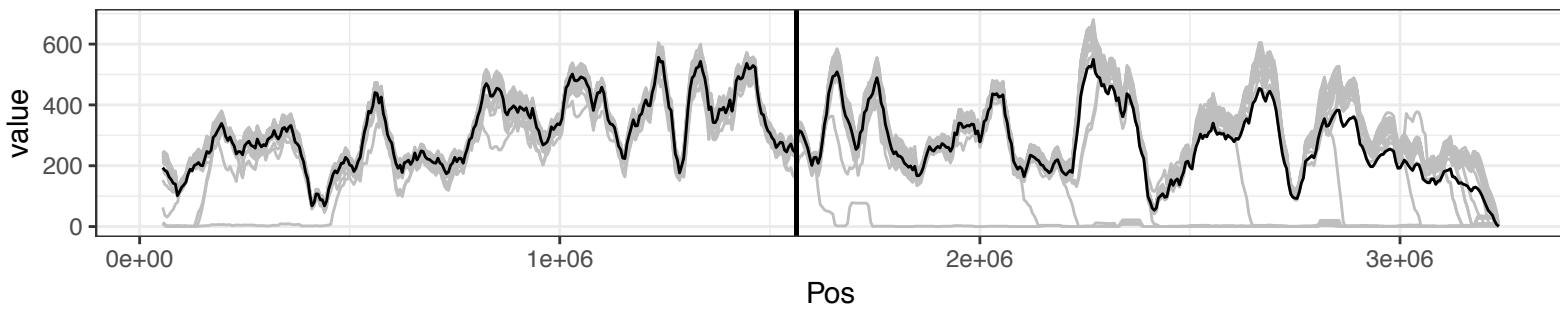

cluster11

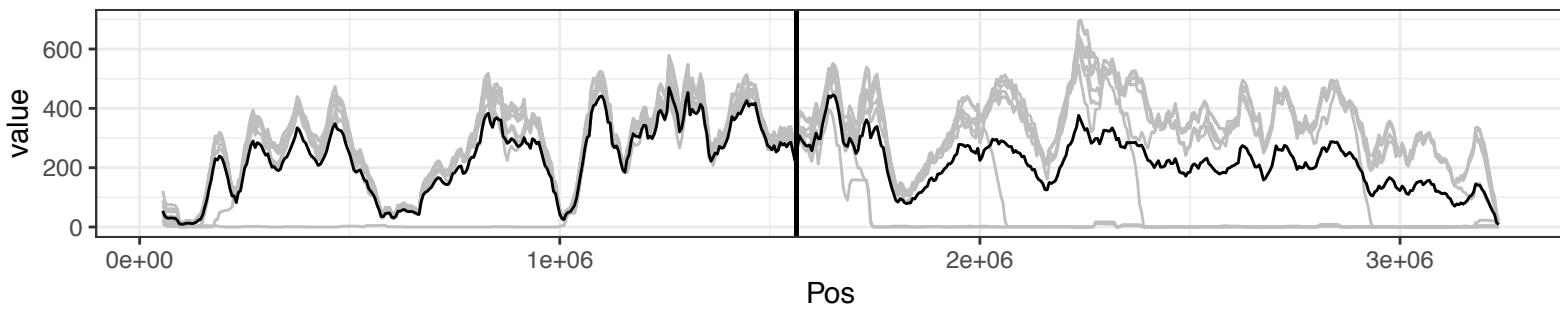

cluster13

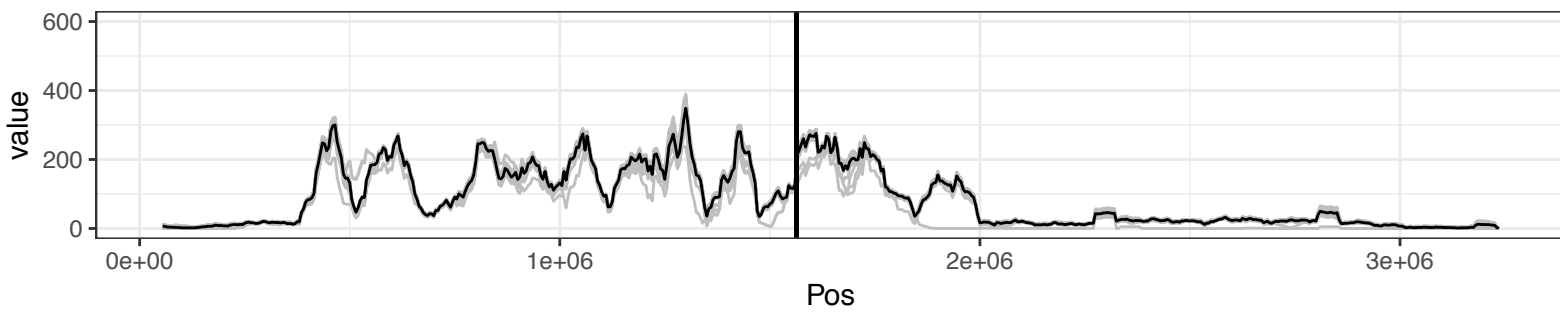

# CHROMOSOME 2: sliding windows of 50,000bp, step 5000

cluster1

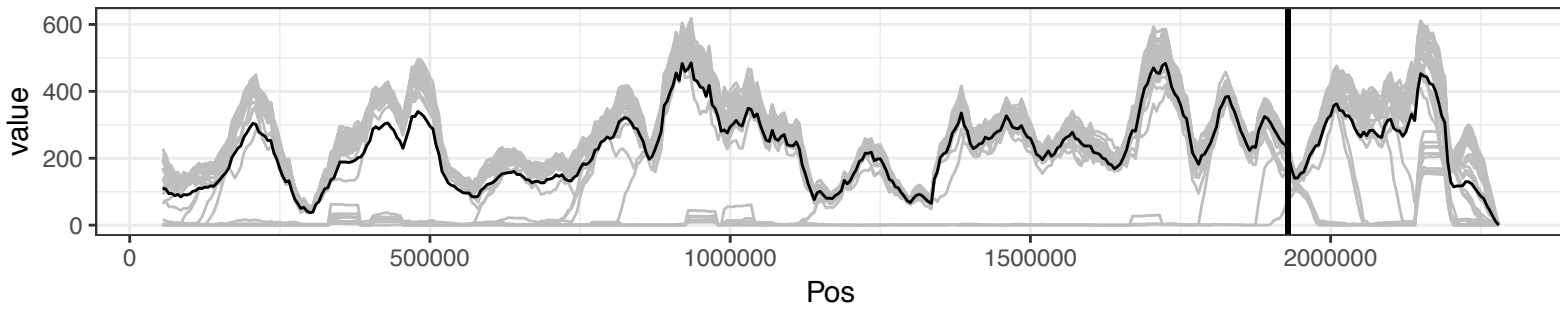

cluster2

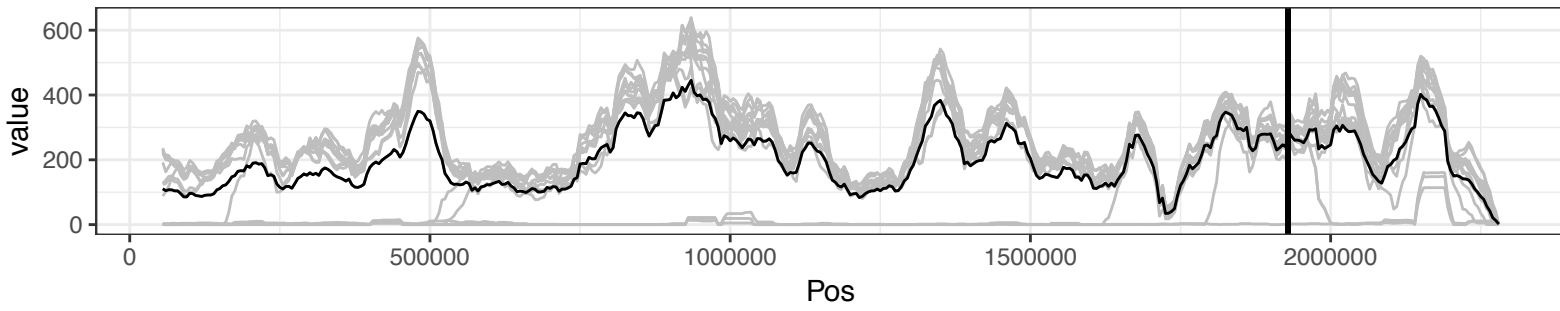

cluster3

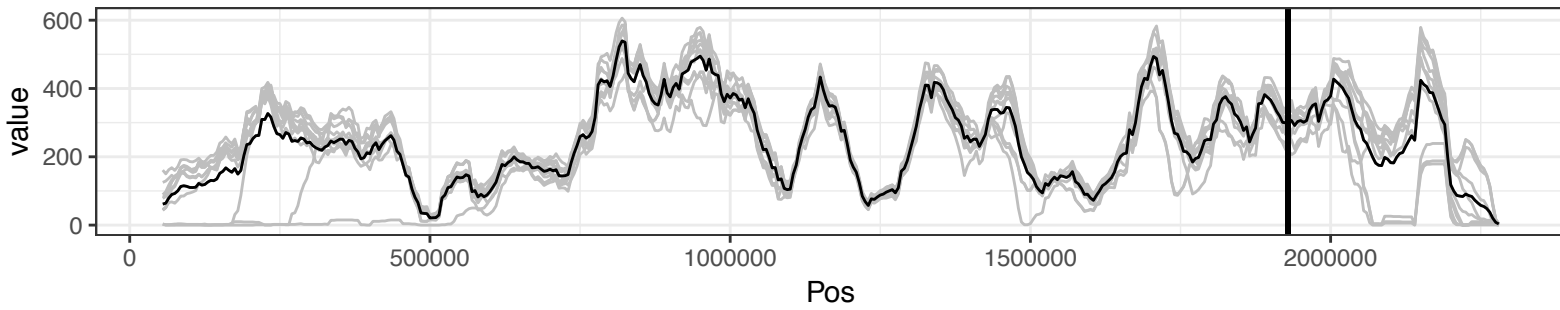

cluster4

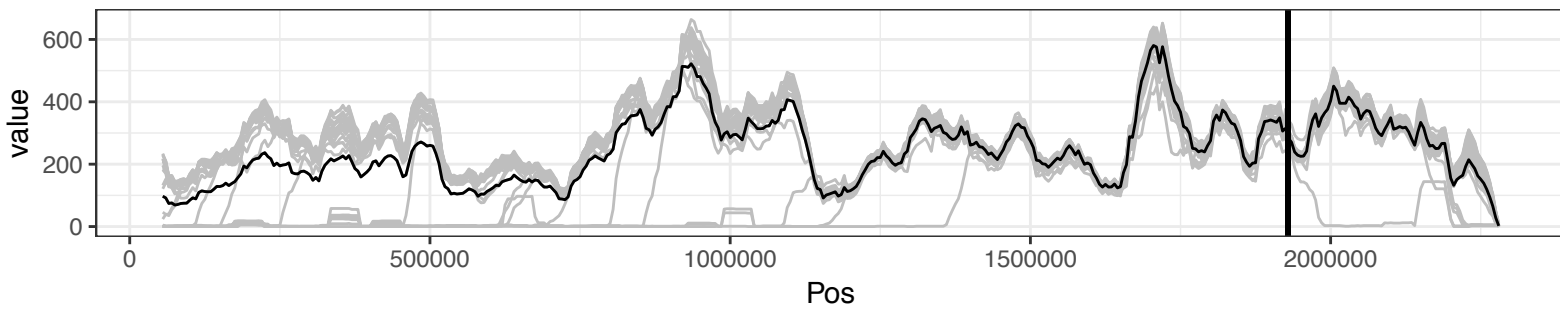

cluster11

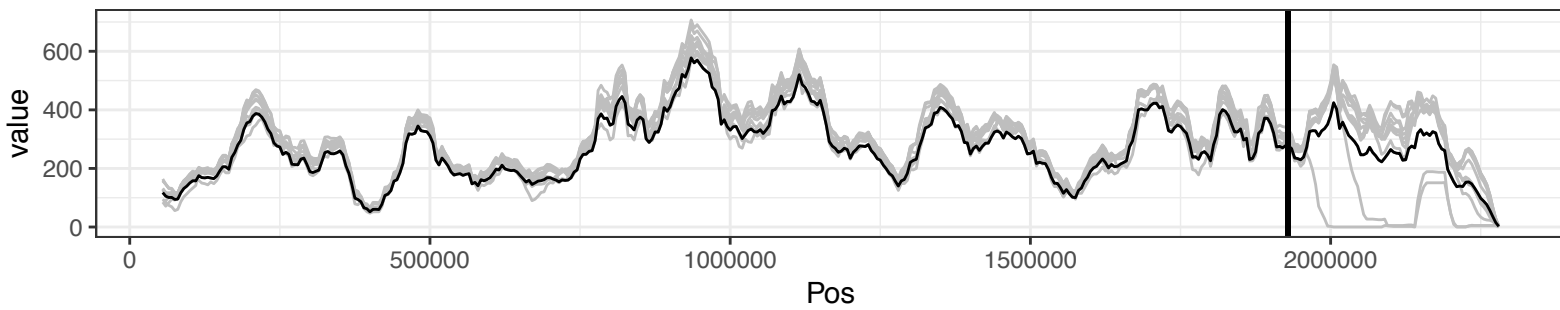

cluster13

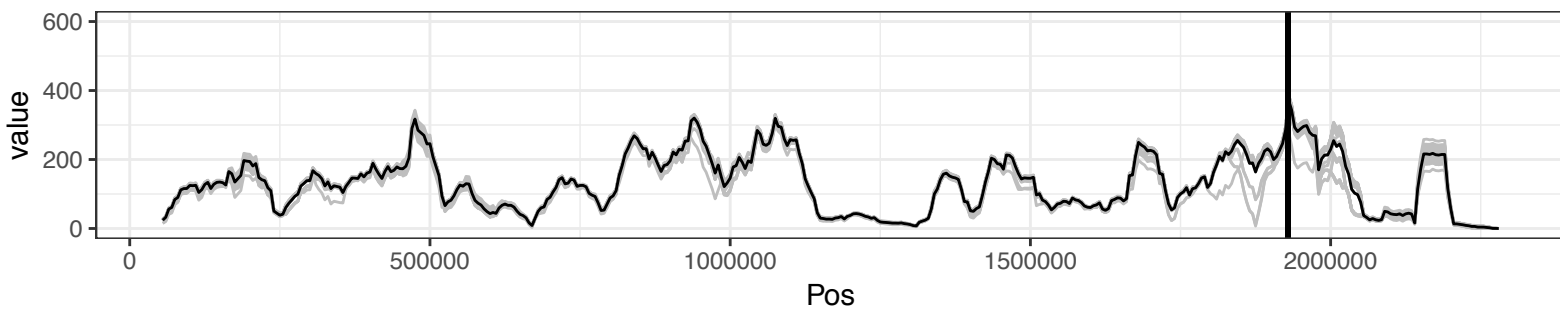

# CHROMOSOME 3: sliding windows of 50,000bp, step 5000

cluster1

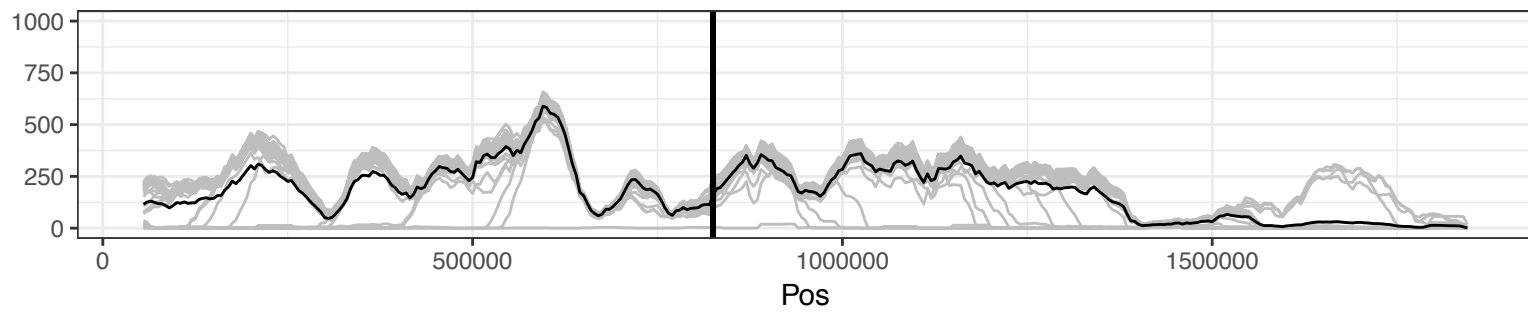

cluster2

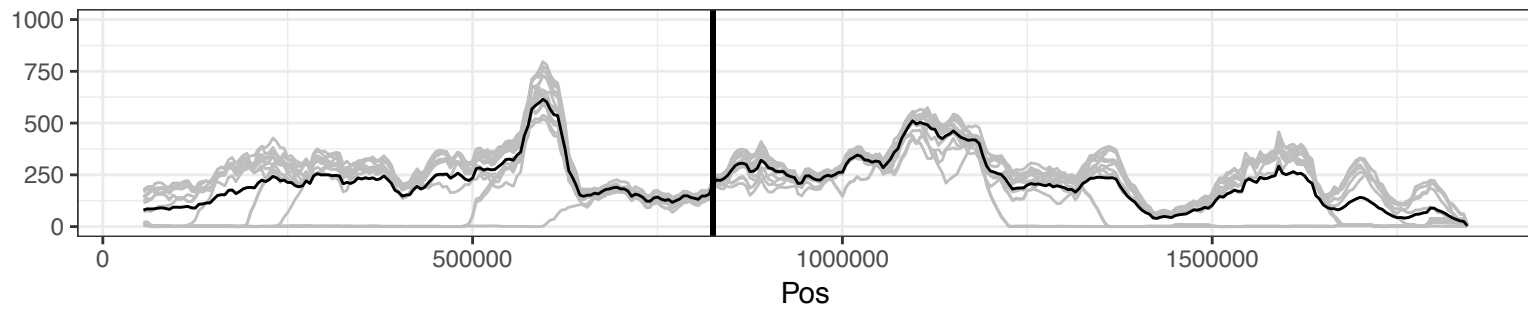

cluster3

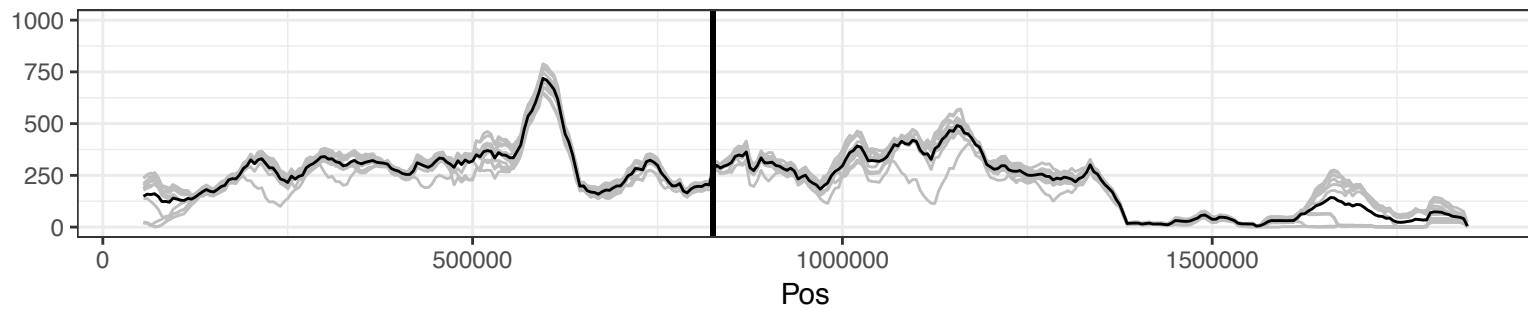

cluster4

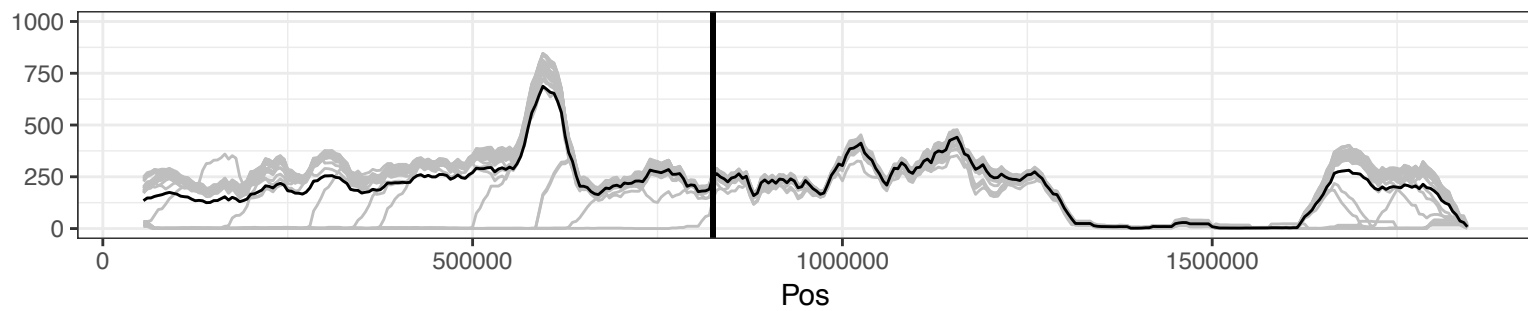

cluster11

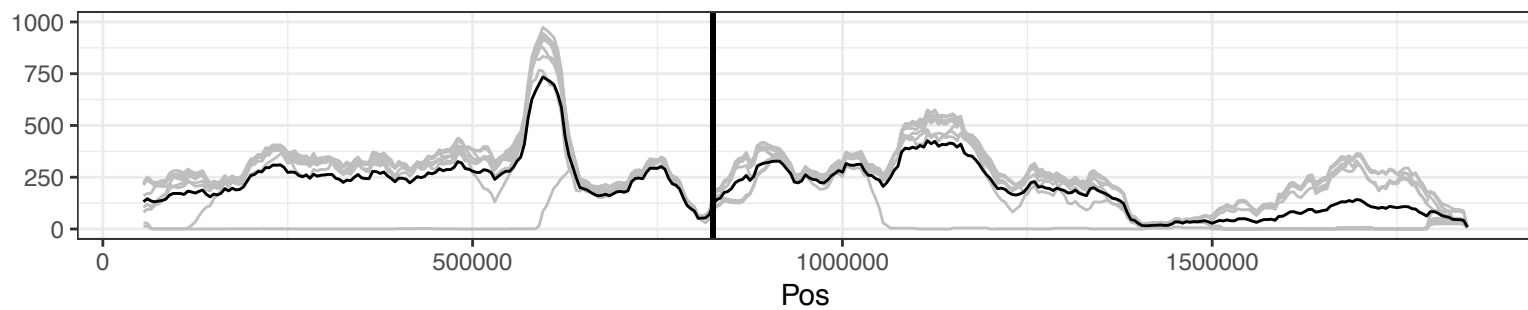

cluster13

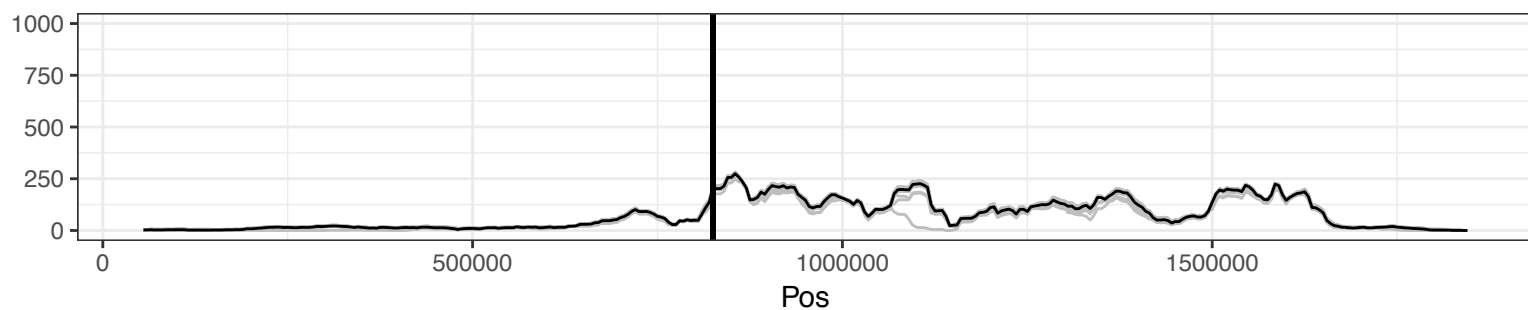



# CHROMOSOME 4: sliding windows of 50,000bp, step 5000

cluster1

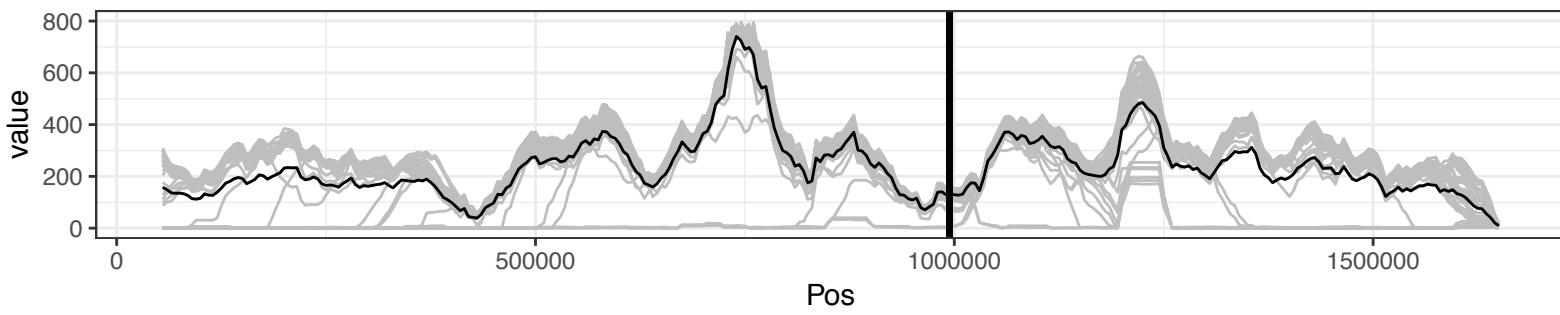

cluster2

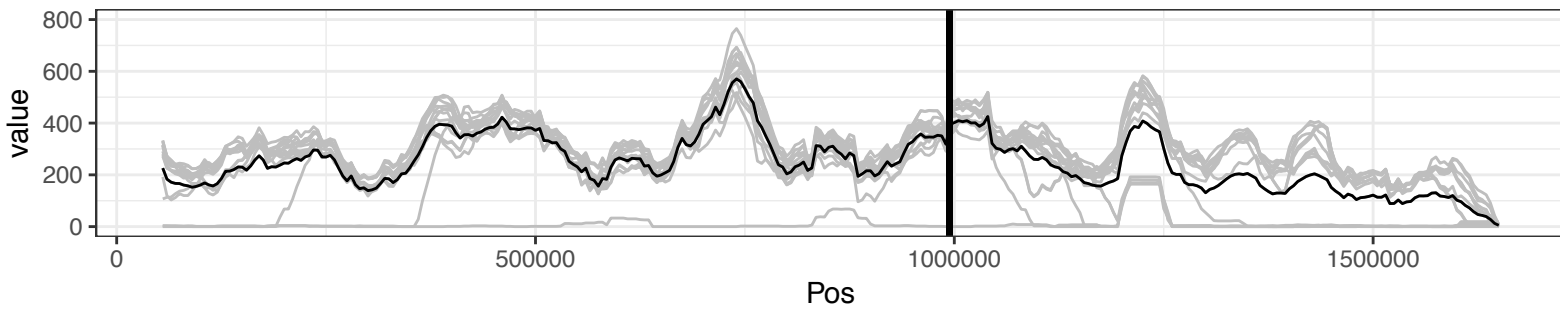

cluster3

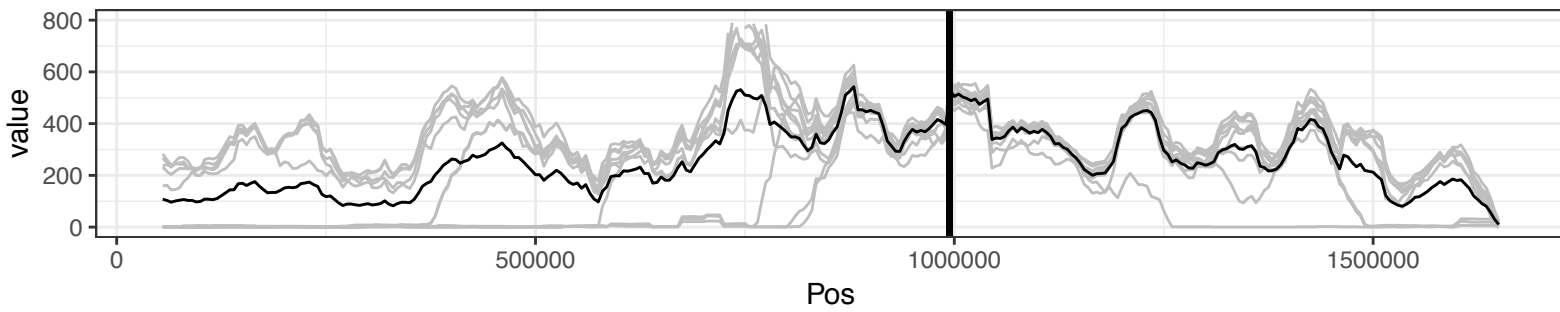

cluster4

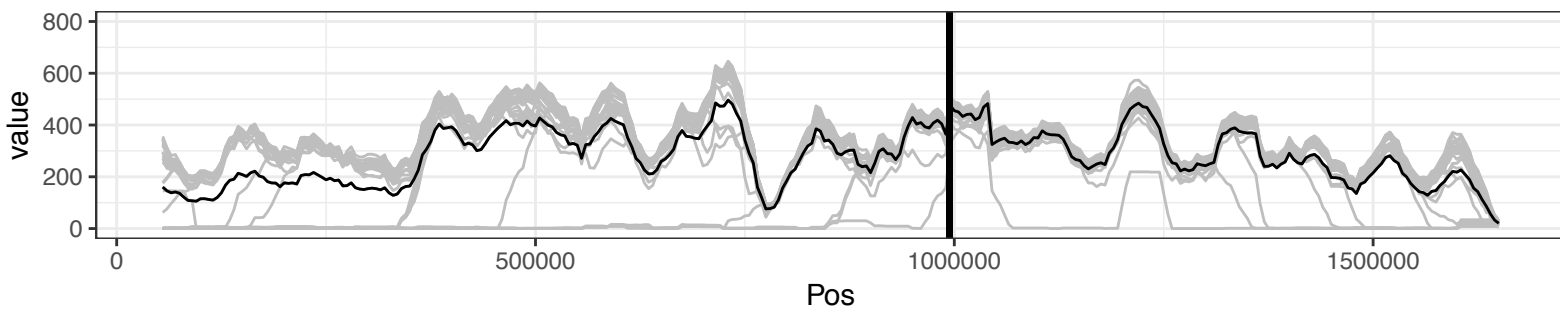

cluster11

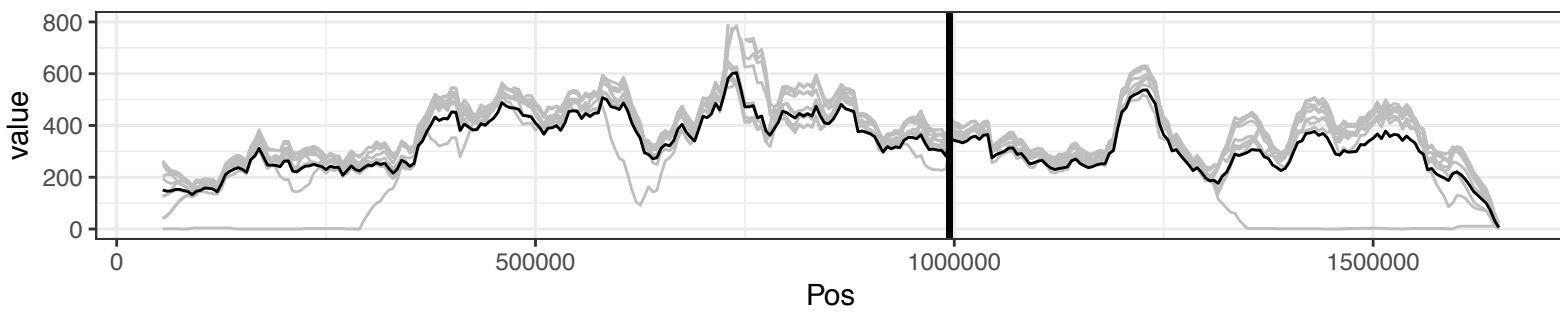

cluster13

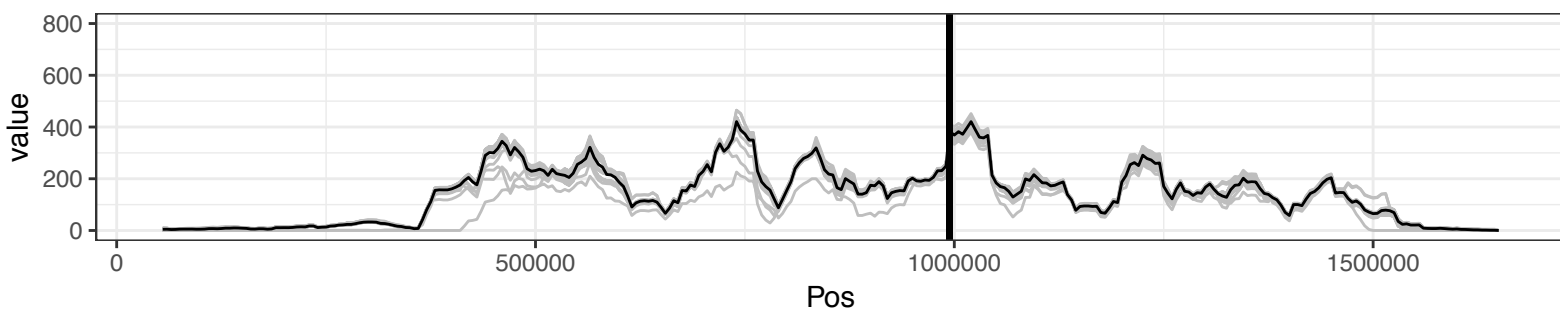

# CHROMOSOME 5: sliding windows of 50,000bp, step 5000

cluster1

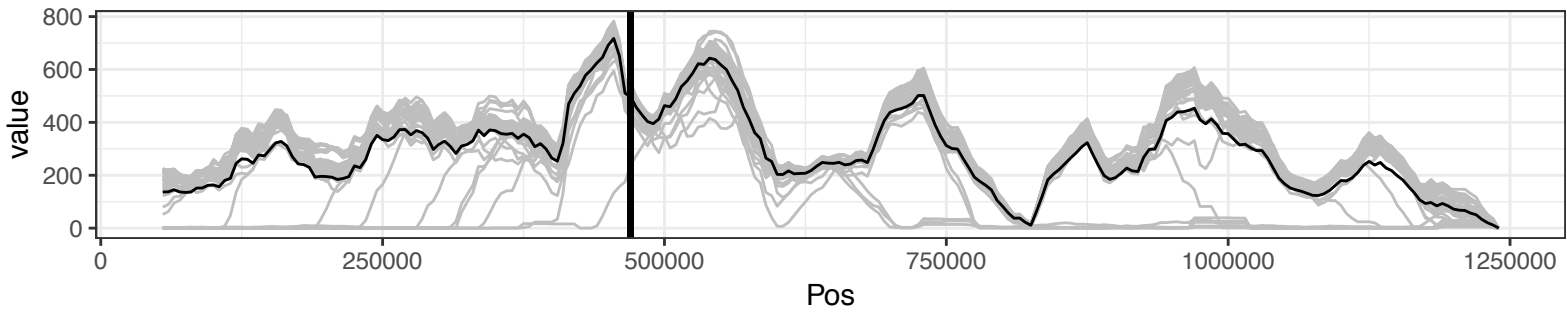

cluster2

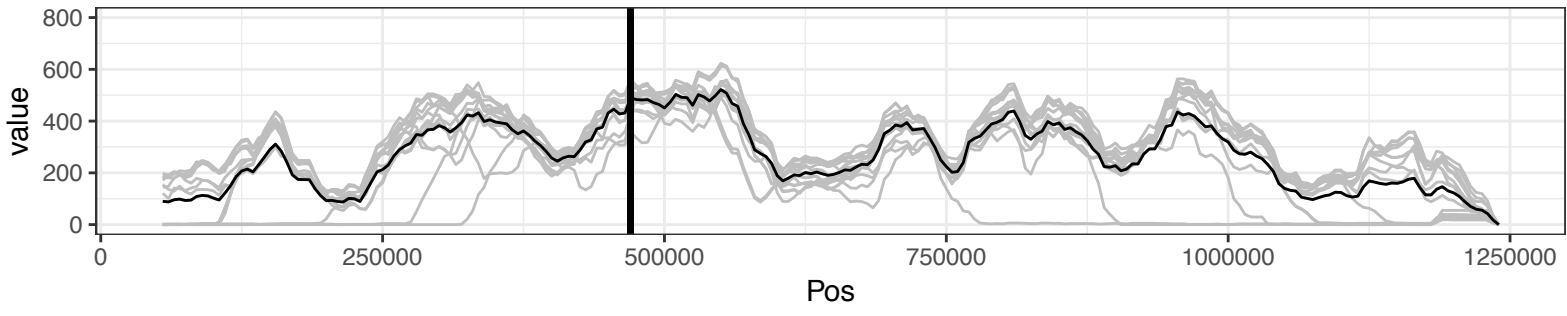

cluster3

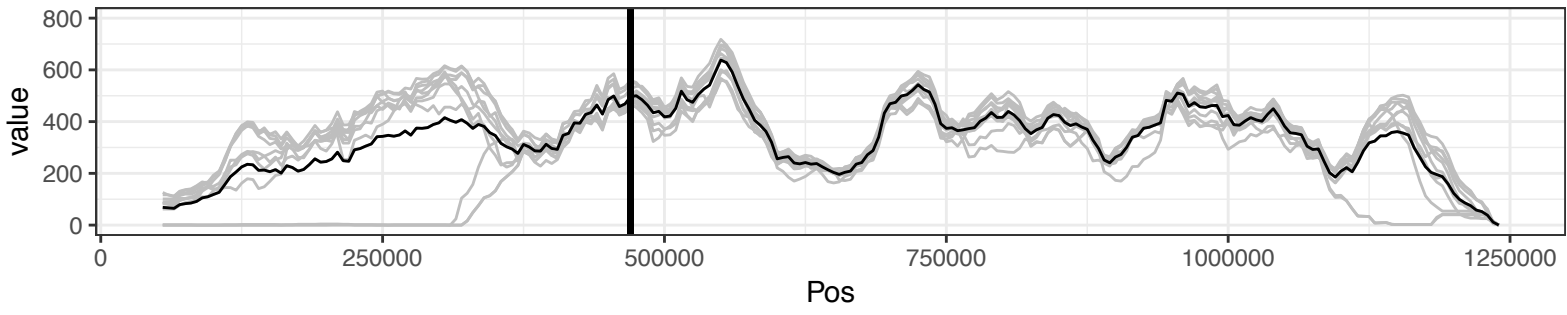

cluster4

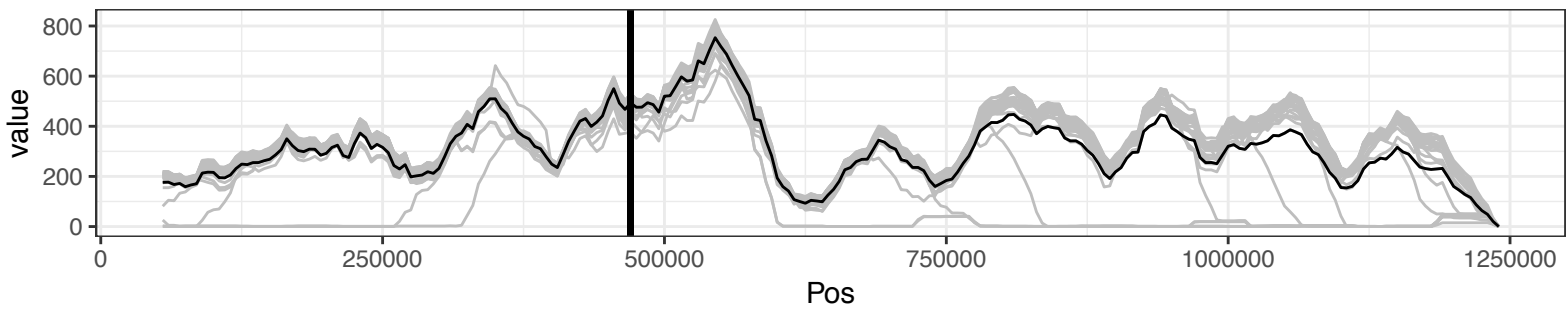

cluster11

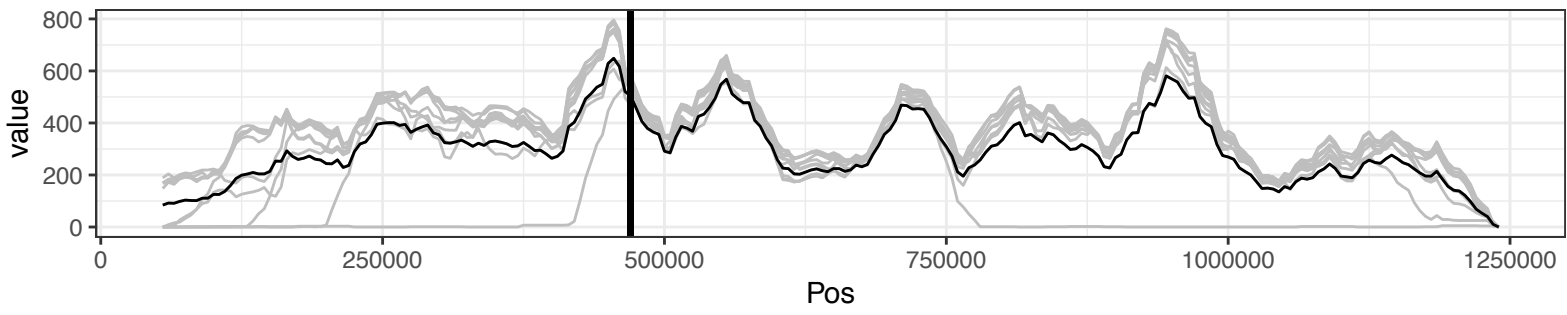

cluster13

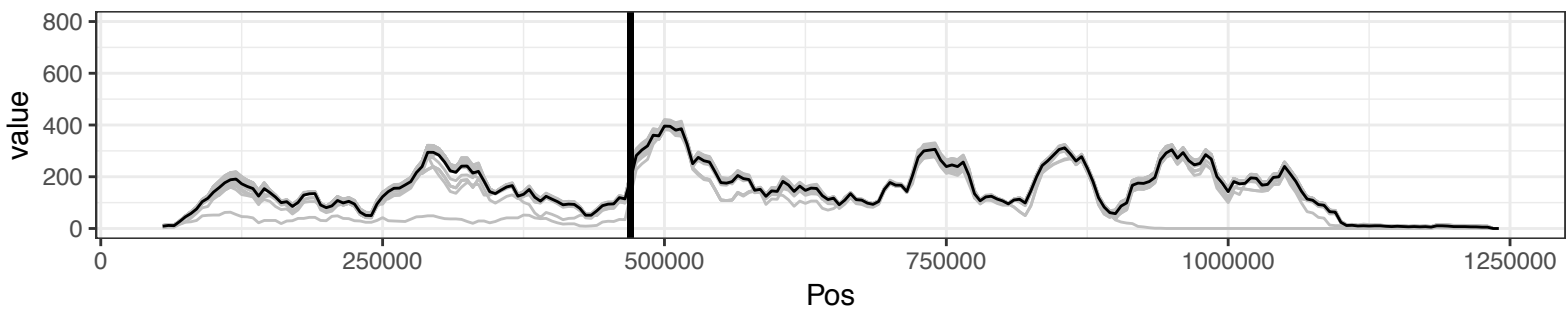

# CHROMOSOME 6: sliding windows of 50,000bp, step 5000

cluster1

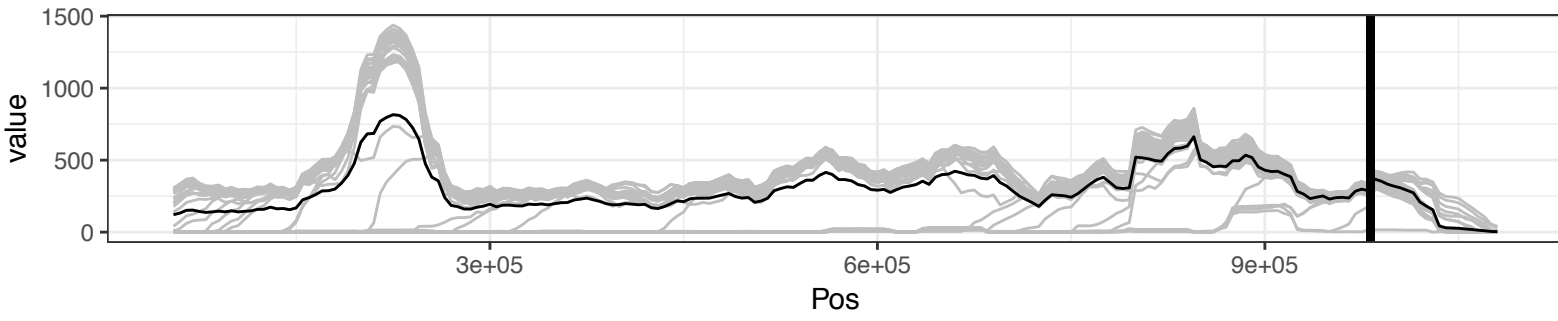

cluster2

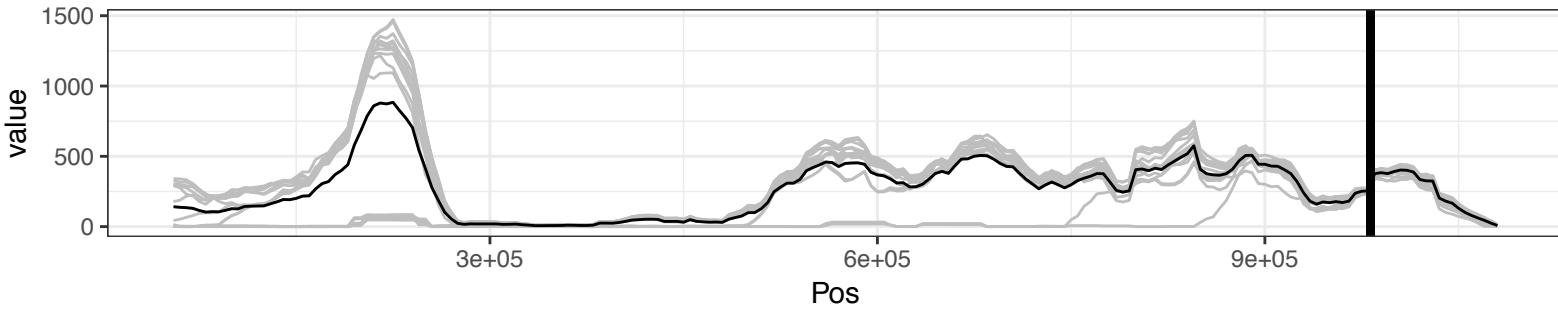

cluster3

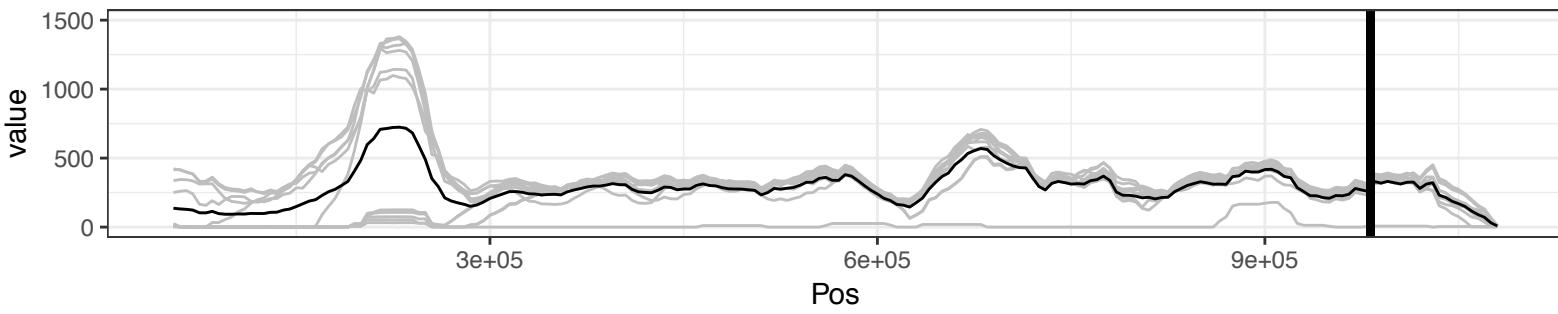

cluster4

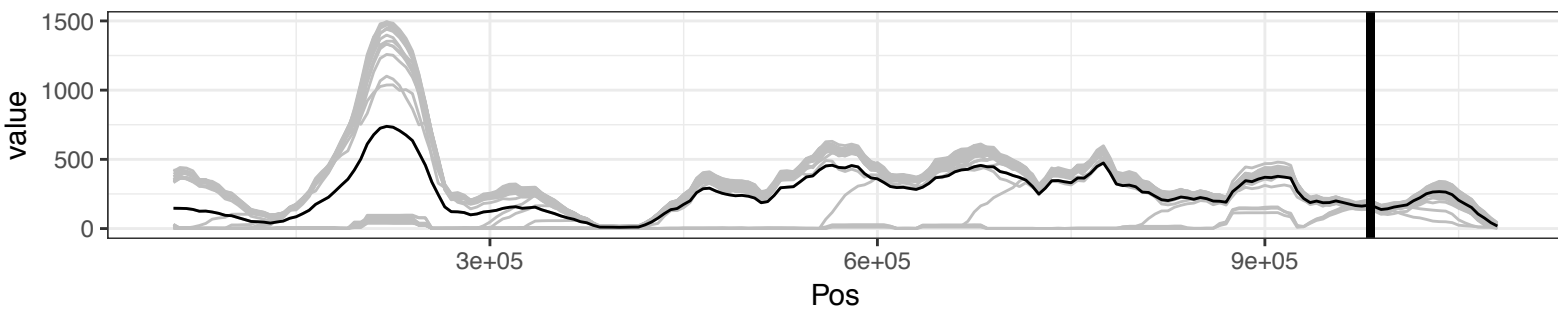

cluster11

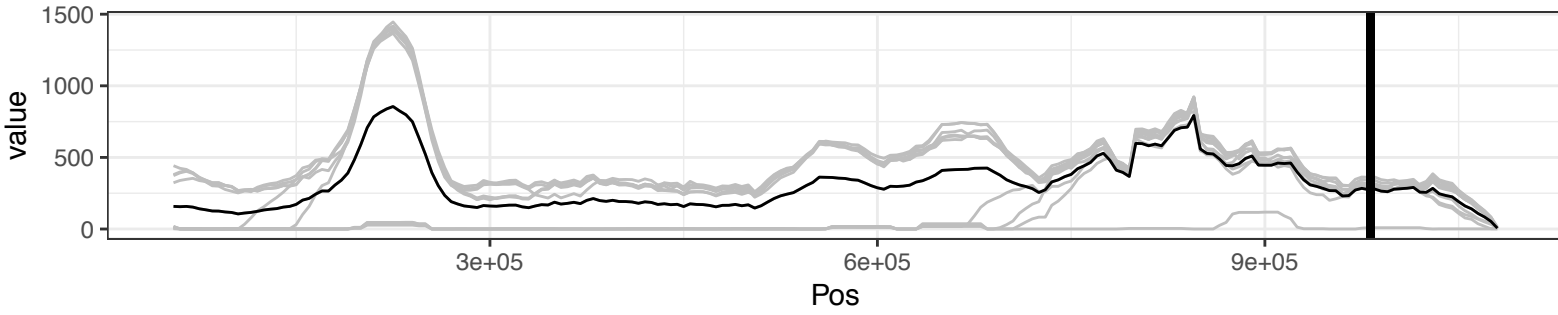

cluster13

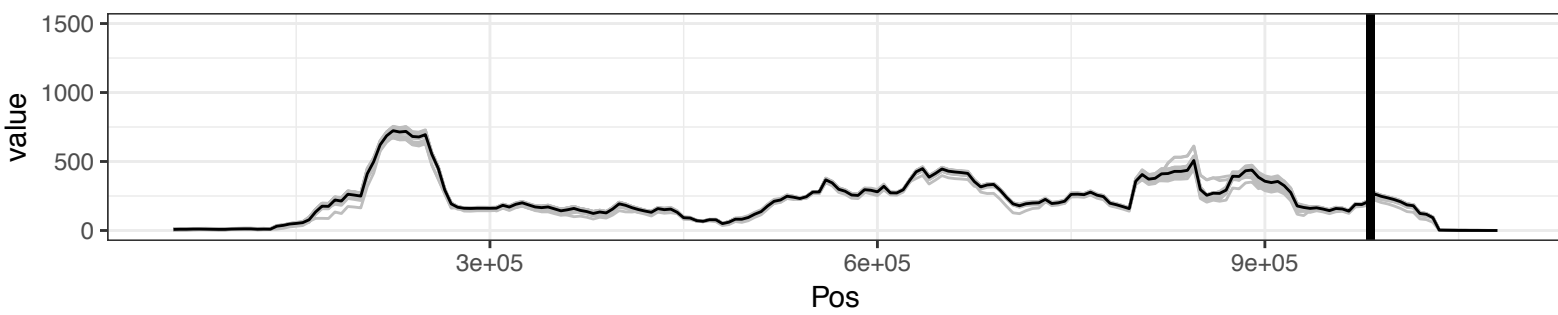

# CHROMOSOME 7: sliding windows of 50,000bp, step 5000

cluster1

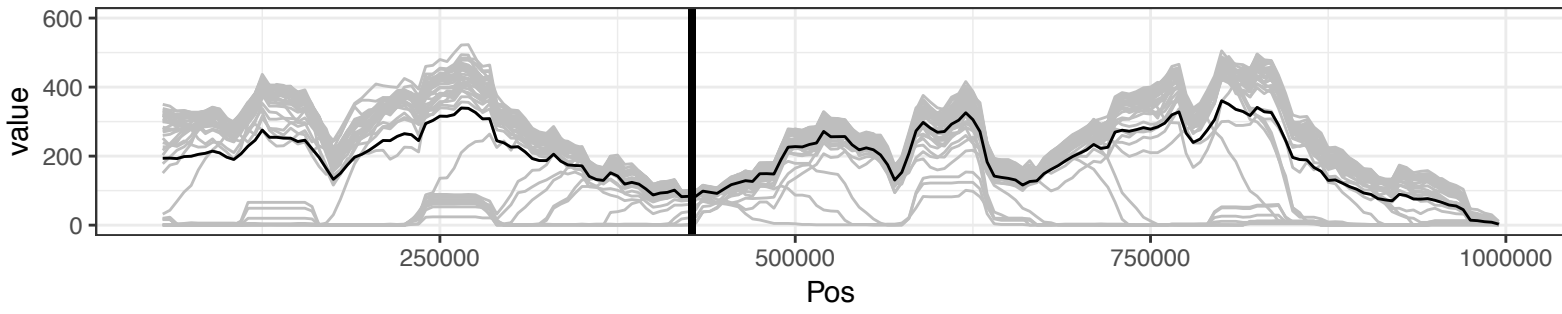

cluster2

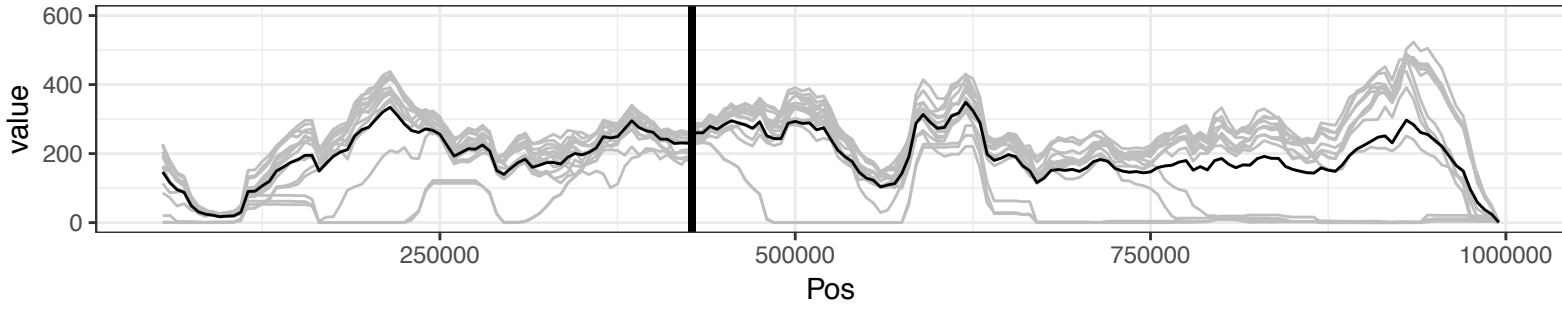

cluster3

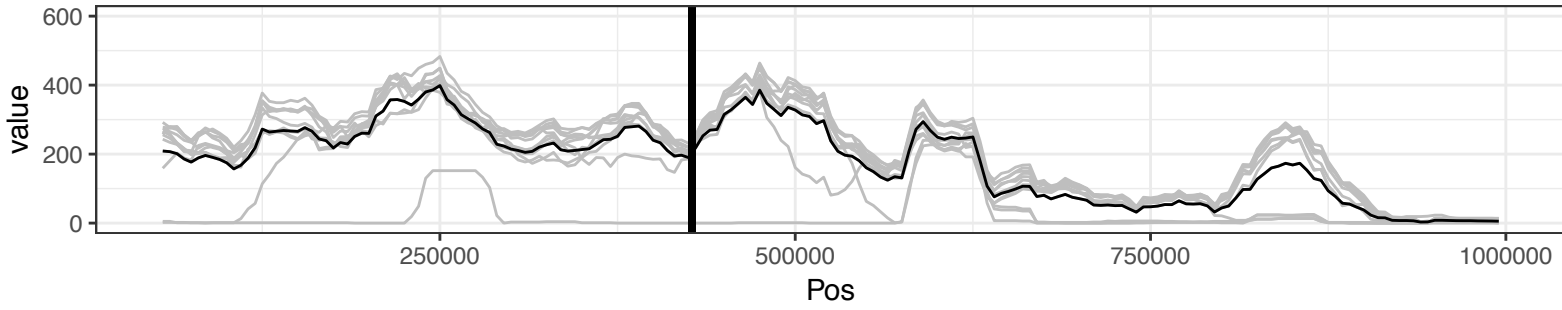

cluster4

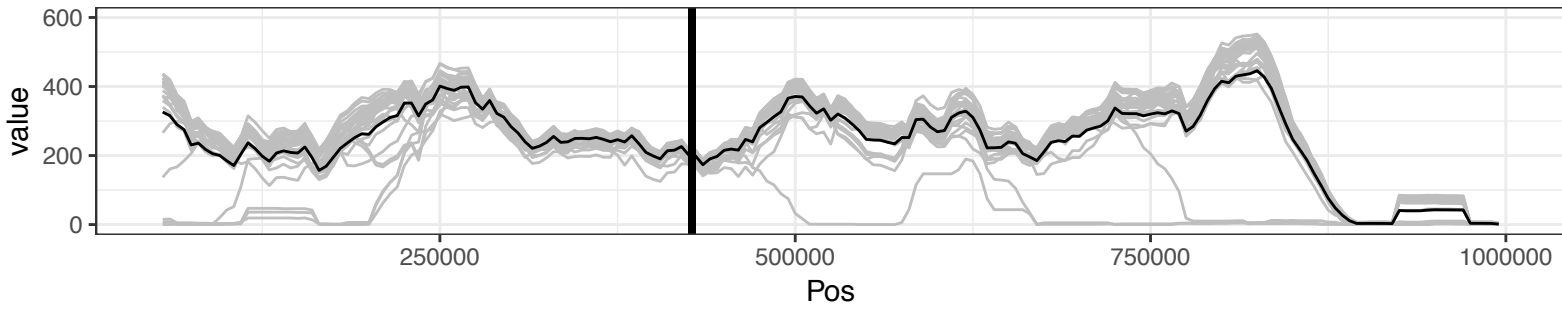

cluster11

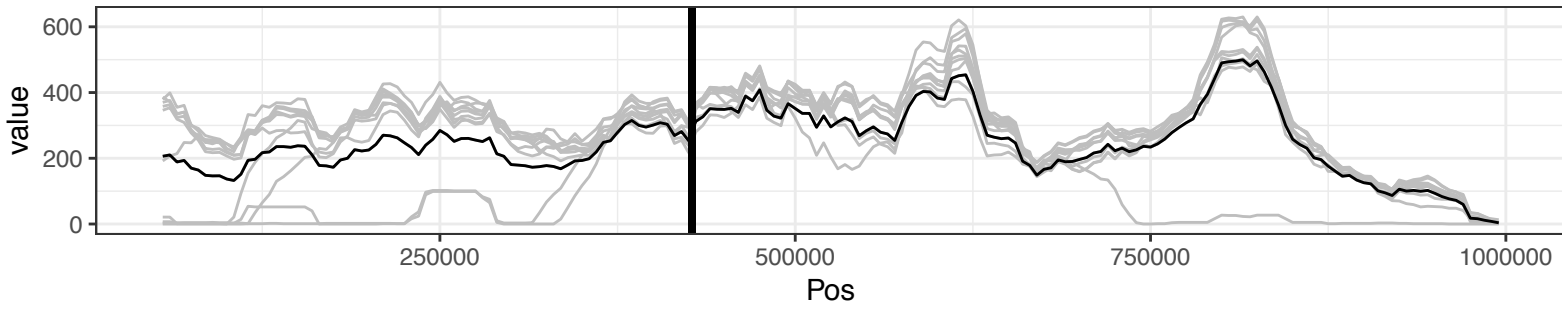

cluster13

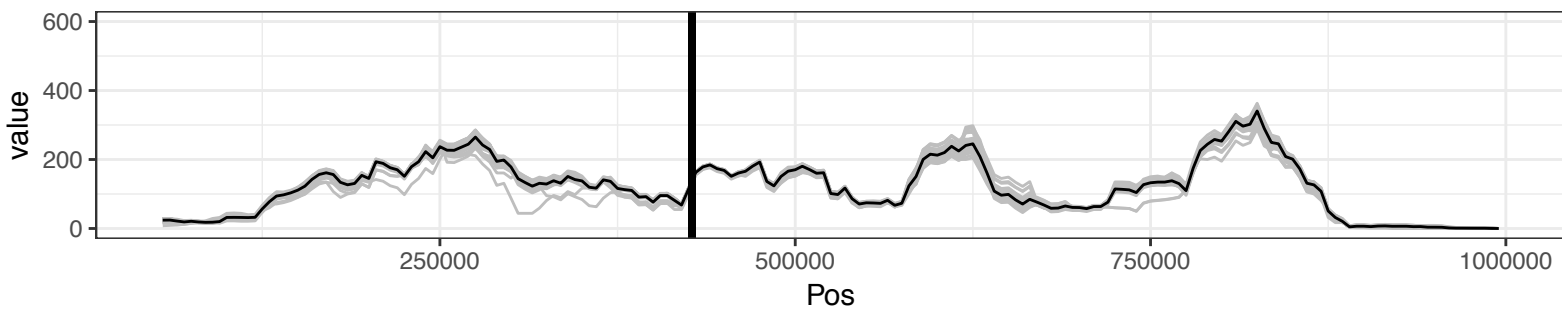

# CHROMOSOME R: sliding windows of 50,000bp, step 5000

cluster1

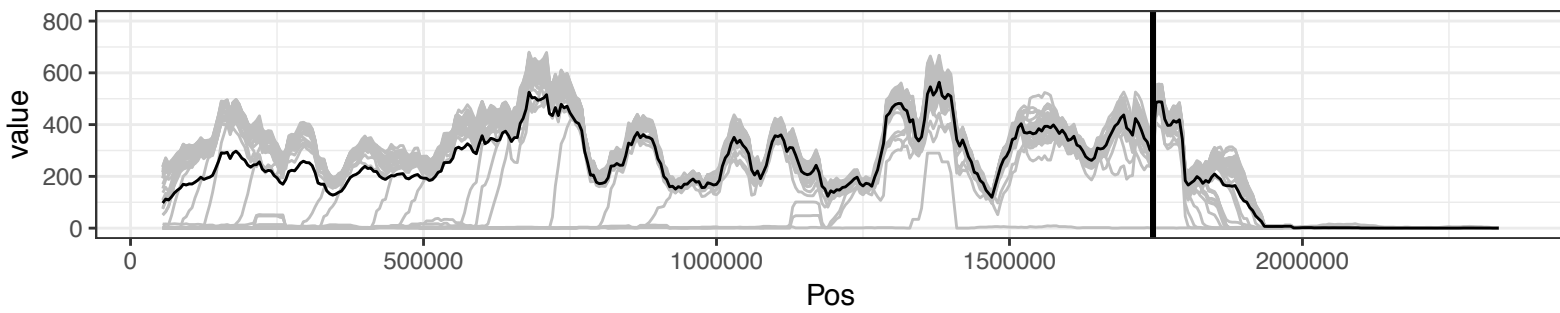

cluster2

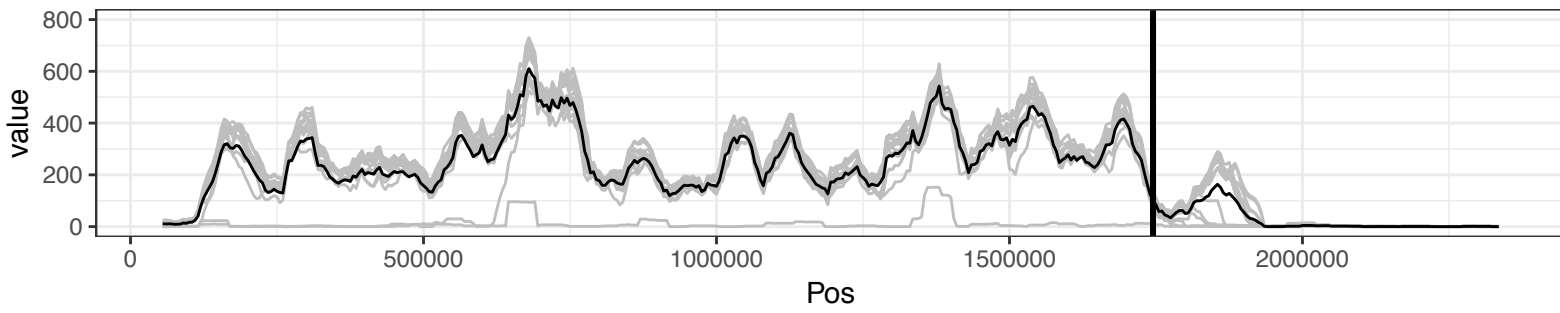

cluster3

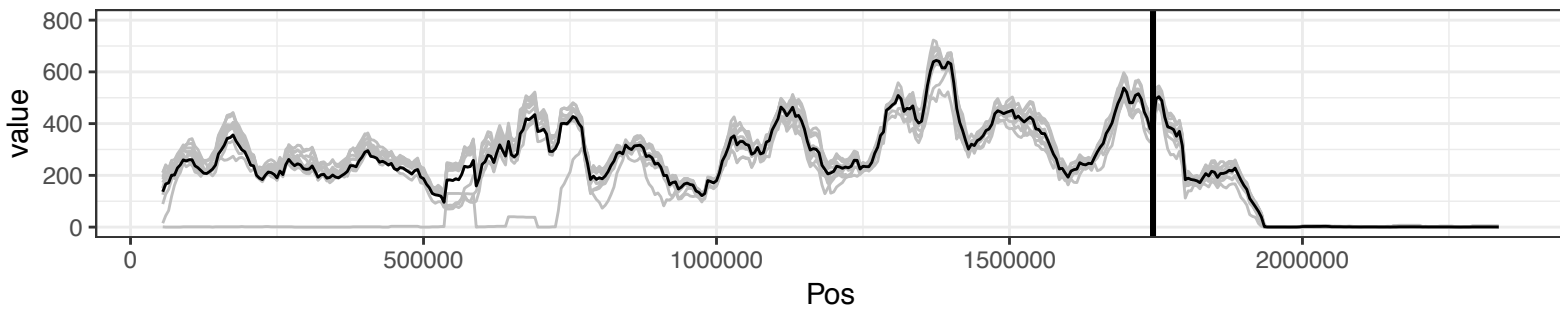

cluster4

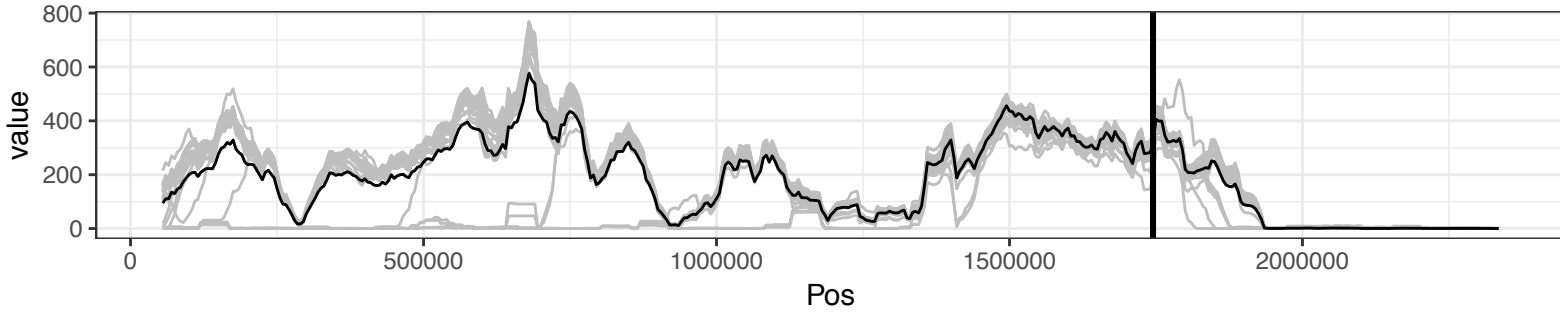

cluster11

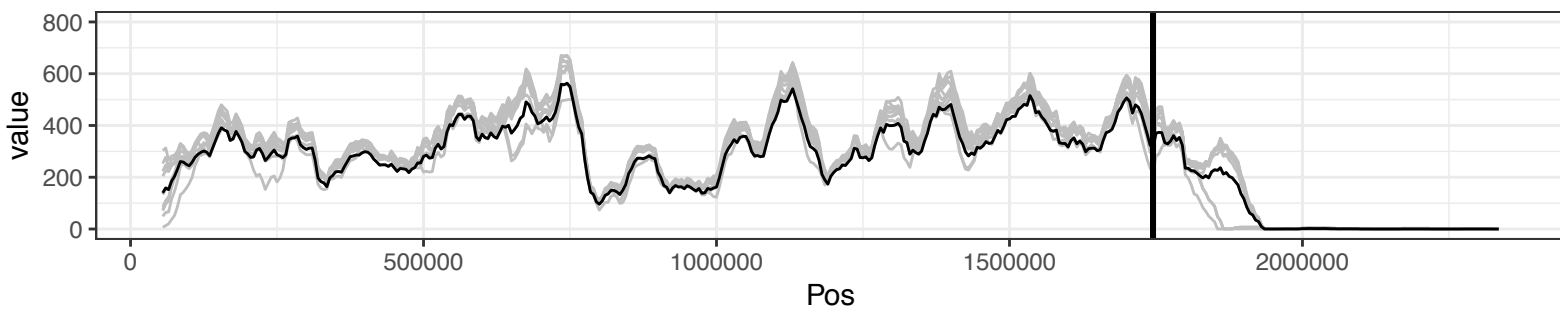

cluster13

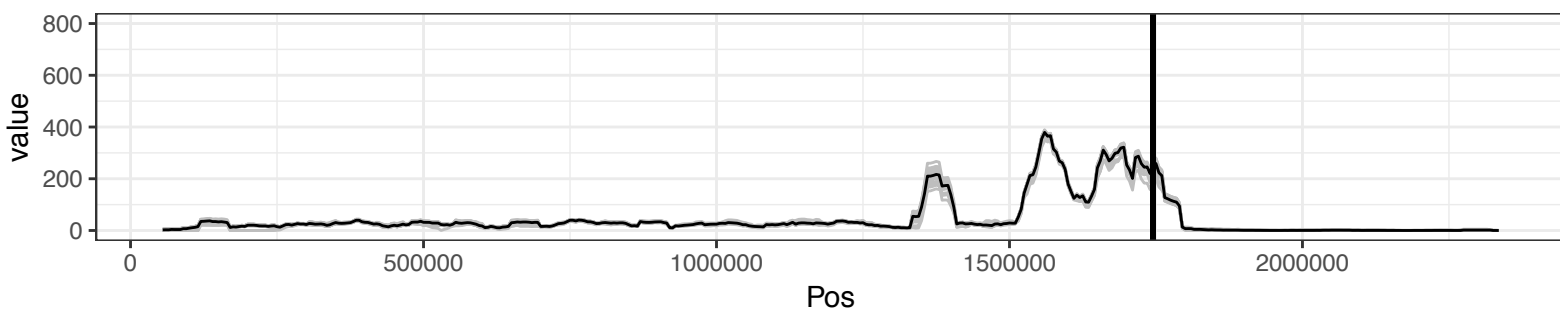

Supplementary Fig. 7: Heterozygosity plots by chromosome and by cluster (for the six most represented clusters 1, 2, 3, 4, 11 and 13). Counts of heterozygous SNPs per windows of 50,000bp were calculated for each strain with a sliding window step of 5,000bp. Plots were generated using the R package ggplot2.

| Fst        | Cluster 2 | Cluster 3 | Cluster 4 | Cluster 11 | Cluster 13 |
|------------|-----------|-----------|-----------|------------|------------|
| Cluster 1  | 0,8       | 0,81      | 0,83      | 0,81       | 0,87       |
| Cluster 2  | X         | 0,77      | 0,81      | 0,78       | 0,87       |
| Cluster 3  | X         | X         | 0,82      | 0,79       | 0,89       |
| Cluster 4  | X         | X         | X         | 0,83       | 0,89       |
| Cluster 11 | X         | X         | X         | X          | 0,9        |

Supplementary Table 1 (related to Fig. 2): Fixation indices (FST) between clusters calculated using ANGSD.

---

|            | pi    |
|------------|-------|
| Cluster 1  | 0.478 |
| Cluster 2  | 0.254 |
| Cluster 3  | 0.386 |
| Cluster 4  | 0.256 |
| Cluster 11 | 0.427 |
| Cluster 13 | 0.140 |

---

Supplementary Table 2 (related to Fig. 1 and 2):  
Nucleotide diversity ( $\Pi$ ) within clusters calculated with samtools.



| <b>Polymorphism</b> | <b>Cluster 1</b> | <b>Cluster 2</b> | <b>Cluster 3</b> | <b>Cluster 4</b> | <b>Cluster 11</b> | <b>Cluster 13</b> |
|---------------------|------------------|------------------|------------------|------------------|-------------------|-------------------|
| <b>Cluster 1</b>    | 28632            | 4989             | 4696             | 4765             | 4438              | 530               |
| <b>Cluster 2</b>    | 4989             | 36720            | 6393             | 6296             | 5233              | 884               |
| <b>Cluster 3</b>    | 4696             | 6393             | 27939            | 5677             | 4854              | 697               |
| <b>Cluster 4</b>    | 4765             | 6296             | 5677             | 34028            | 5081              | 838               |
| <b>Cluster 11</b>   | 4438             | 5233             | 4854             | 5081             | 24350             | 749               |
| <b>Cluster 13</b>   | 530              | 884              | 697              | 838              | 749               | 12310             |

Supplementary Table 3 (related to Supplementary Data 3): Number of polymorphic positions per cluster.

| Media                                              | Nutrients                                         | Concentration (g/L) | Weight for 200mL | Volume (L)   | Initial concentration |
|----------------------------------------------------|---------------------------------------------------|---------------------|------------------|--------------|-----------------------|
| <b>VSM<br/>(Vaginal<br/>Simulative<br/>Medium)</b> | NaCl                                              |                     |                  | 0,0116       | 5mM                   |
|                                                    | KOH                                               |                     |                  | 0,036        | 2,8g->100mL=0,5M      |
|                                                    | Glycerol                                          |                     |                  | 0,000128     | 99%                   |
|                                                    | Ca(OH) <sub>2</sub>                               |                     |                  | 0,2          | 0,15g->200mL=0,01M    |
|                                                    | Urea                                              |                     |                  | 0,0134       | 3g->100mL=0,5M        |
|                                                    | Glucose                                           |                     |                  | 0,066        | 9g->100mL=0,5M        |
|                                                    | YNB                                               |                     |                  | weight: 6,7g | solid YNB             |
|                                                    | Acetic acid                                       |                     |                  | 0,0085       | 2M                    |
|                                                    | Lactic acid                                       |                     |                  | 0,00192      | Pure                  |
| <b>SSM (Saliva<br/>Simulative<br/>Medium)</b>      | KCl                                               | 0,72                | 0,144            |              |                       |
|                                                    | CaCl <sub>2</sub> (H <sub>2</sub> O) <sub>2</sub> | 0,22                | 0,044            |              |                       |
|                                                    | NaCl                                              | 0,6                 | 0,12             |              |                       |
|                                                    | KH <sub>2</sub> PO <sub>4</sub>                   | 0,68                | 0,136            |              |                       |
|                                                    | Na <sub>2</sub> HPO <sub>4</sub>                  | 0,343               | 0,0686           |              |                       |
|                                                    | KHCO <sub>3</sub>                                 | 1,5                 | 0,3              |              |                       |
|                                                    | KSCN                                              | 0,06                | 0,012            |              |                       |
|                                                    | Citric acid                                       | 0,03                | 0,006            |              |                       |
|                                                    | Agar                                              | 20                  | 4                |              |                       |

Supplementary Table 4: Composition of vaginal simulative medium (VSM) and saliva simulative medium (SSM).

| <b>ORFs</b>  | <b>Primer pairs</b>      | <b>Side</b> |
|--------------|--------------------------|-------------|
| <i>AFG1</i>  | GCCGCGTGTTAATCAGAGATC    | Forward     |
|              | TATAGTGCCACCGCATCTTG     | Reverse     |
| <i>BMT6</i>  | CACCATACGCTCTACAAAACCTCA | Forward     |
|              | ATGGAATTGAGCGAGACGTT     | Reverse     |
| <i>SFL1</i>  | TGTTCTGCAACGGGATTAGG     | Forward     |
|              | AACCTCAACGTTGCTCCTCA     | Reverse     |
| <i>VTA1</i>  | AGGAGCACCGAAATATTTACCAG  | Forward     |
|              | CAAATTTAGCATGCTTTTGCAC   | Reverse     |
| <i>ZCF29</i> | CACGGATCTGTTTCCTTCACA    | Forward     |
|              | CGATTCCCAGTAGCATGACATA   | Reverse     |

Supplementary Table 5: Primer pairs used to check the presence of premature stop codons in six ORFs (*AFG1*, *BMT6*, *SFL1*, *VTA1* and *ZCF29*).
